# Supplementary material
Source: PubMed Central journal article supplement (PMC4587597)
Supplement: suppdata.pdf [file suppdata.pdf]

**Supplemental Figure 1:** The stack-bar chart of predominant canonical pathways of differentially expressed GBM proteins identified by IPA. The red and green color in each bar represent up- and down-regulated proteins, respectively

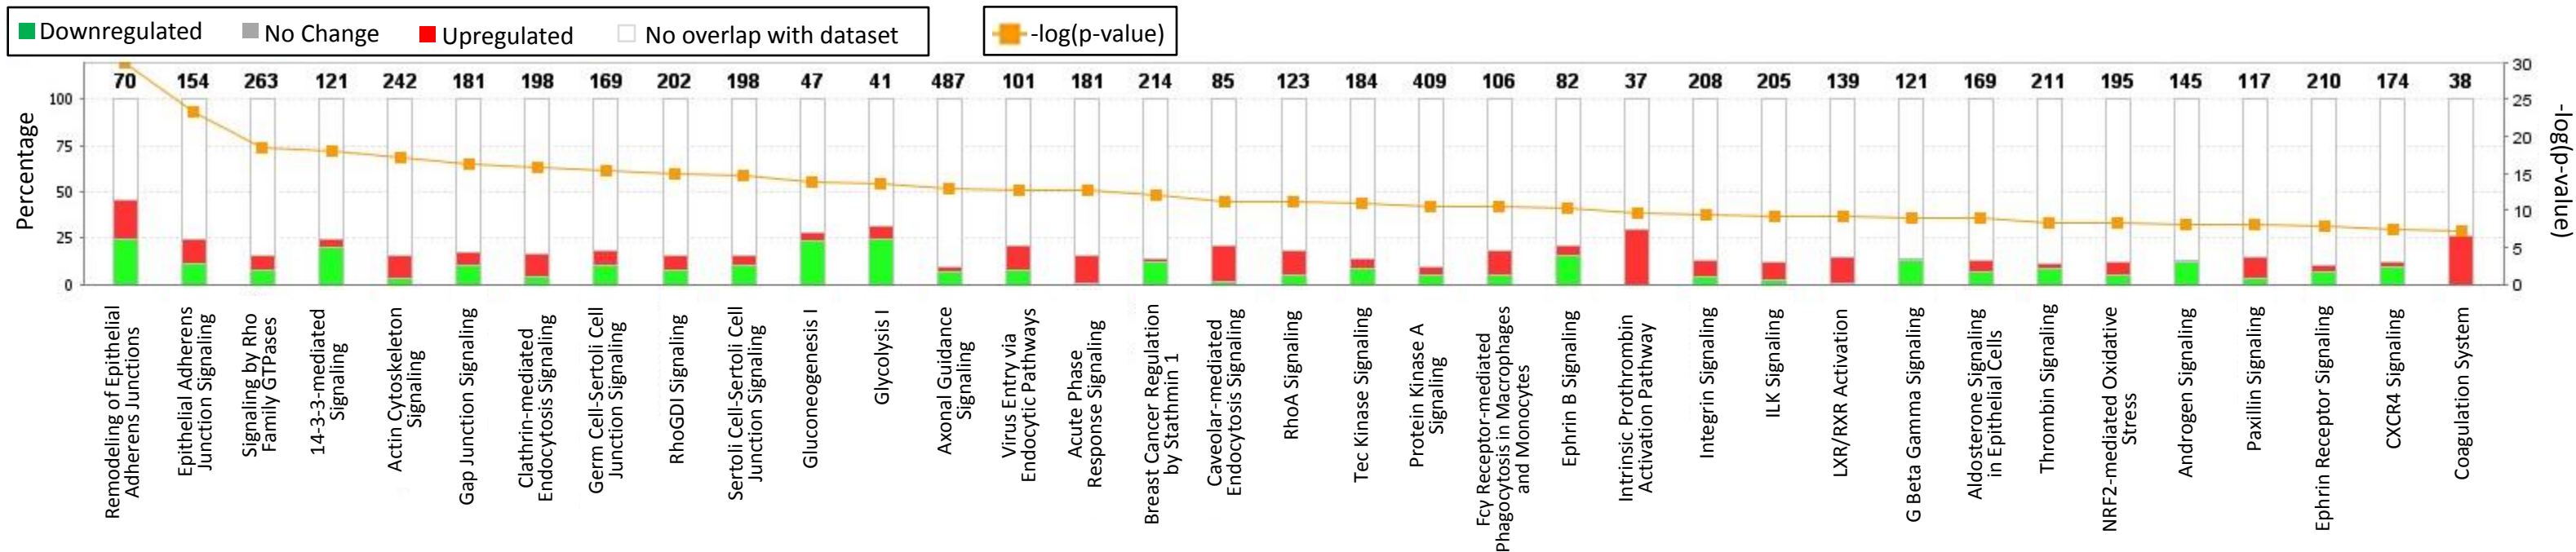

**Supplemental Figure 2:** Overlapping of canonical pathways of differentially expressed proteins in GBM as produced by IPA network analysis. A maximum of 25 pathways displayed with 12 common molecules overlapping is allowed in this network analysis

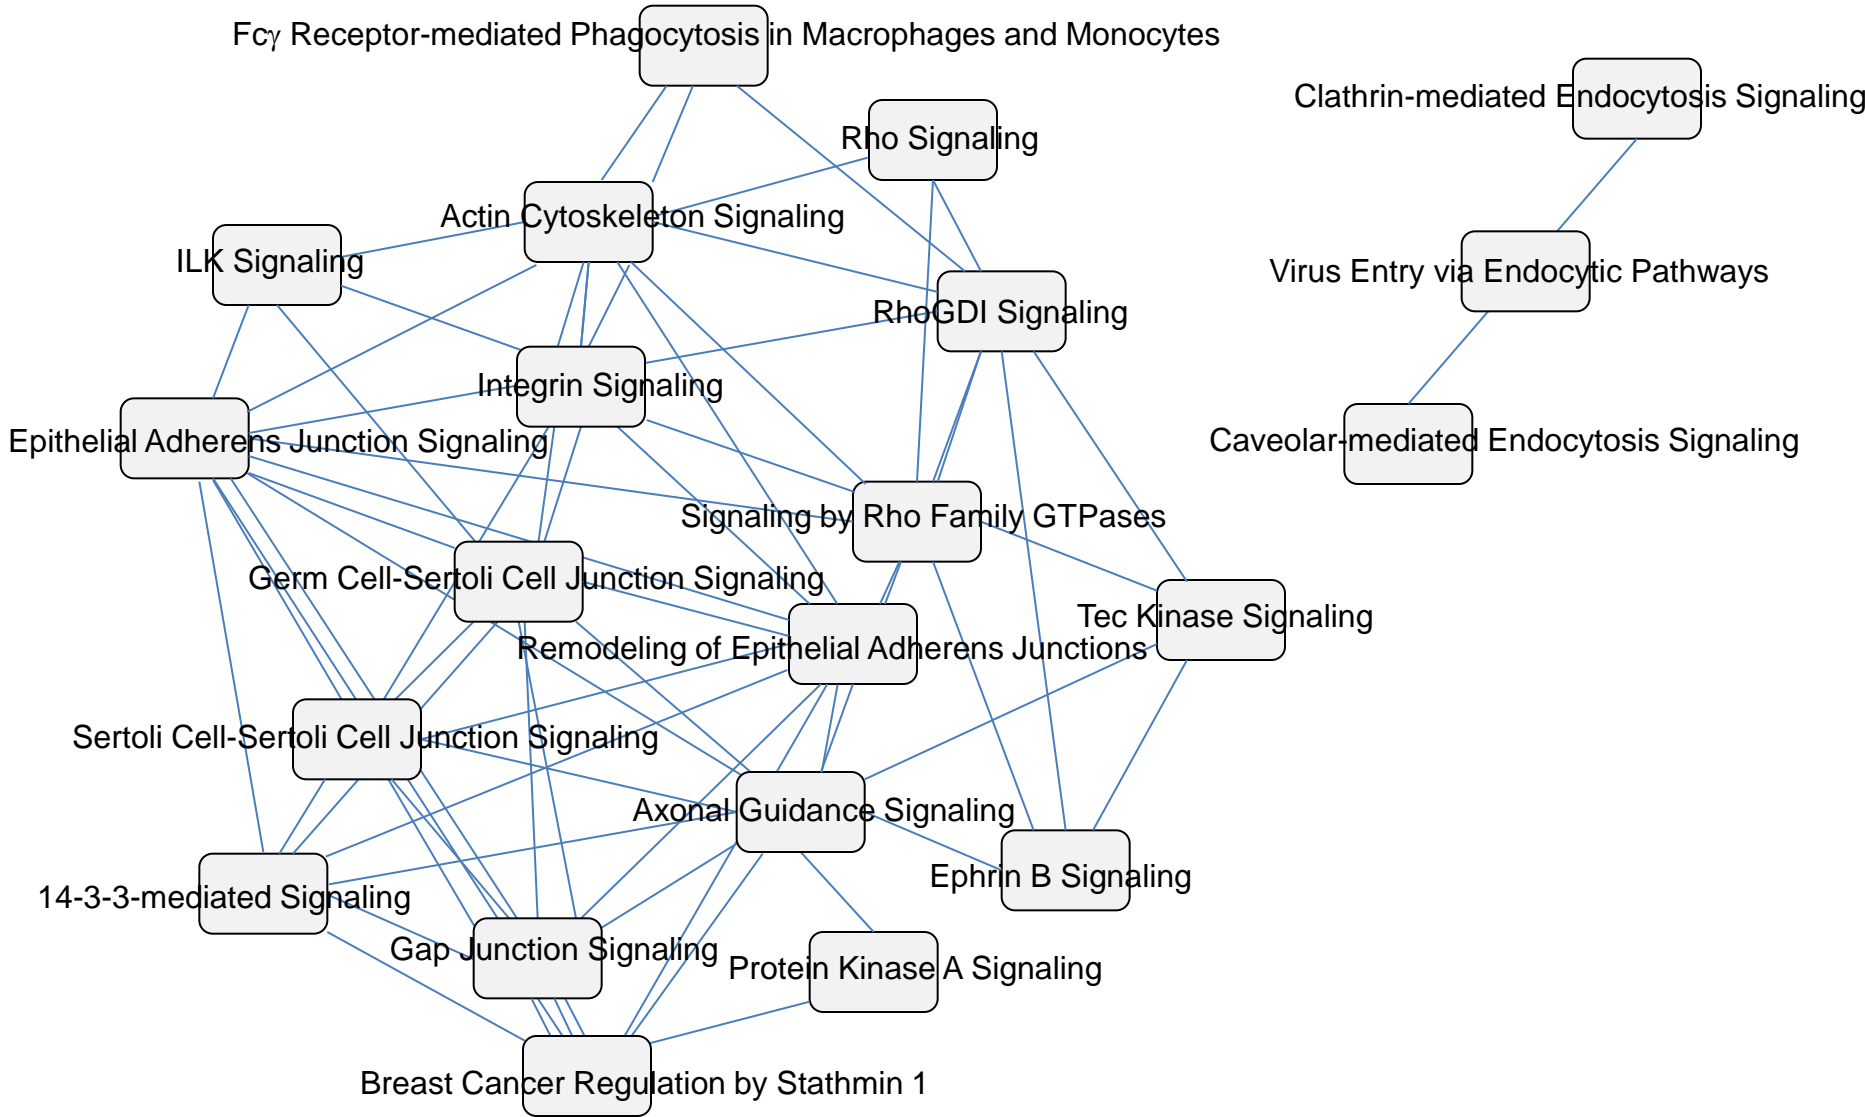

### **SDS-PAGE and Western Blotting Materials:**

PBST: Gibco 70011-044 supplemented with 0.5% Tween-20.

TBST: 10 mM Tris-Cl pH 7.5, 150 mM NaCl, 0.8% Tween-20.

Ponceau S solution: Sigma-Aldrich P7170

3-8% Tris-Acetate gel (Life Technologies, Inc. P/N EA03755BOX)

4-12% Bis-Tris gel (Life Technologies, Inc. P/N NP0336BOX)

Tris-Acetate-SDS Running Buffer (20X) (Life Technologies, Inc. P/N LA0041)

MOPS-SDS Running Buffer (20X) (Life Technologies, Inc. P/N NP0001)

Nitrocellulose membrane, 0.45  $\mu$ m pore size (Life Technologies, Inc. P/N LC2001)

PVDF membrane (Life Technologies, Inc. P/N LC2002)

NuPAGE Transfer Buffer (20X) (Life Technologies, Inc. P/N NP0006-1). (Transfer buffer was used at 2X and supplemented with 10% methanol.)

HRP-conjugated secondary antibodies were detected with Pierce Supersignal West chemiluminescent substrates, using Pico (P/N 34077), Dura (P/N 34075), or Femto (P/N 34095) reagents as required for optimum signal.

Autoradiography film (Midsco, Inc. P/N BX57)

Restore Western Blot Stripping Buffer (Thermo Scientific P/N 21059)

### **General protocol for western blotting:**

1. Run gel according to manufacturer's specifications.
2. Transfer protein to membrane at 30V constant for 60 min at 4°C.
3. Stain membrane in Ponceau S solution for 5 min. Rinse with milliQ H<sub>2</sub>O until bands are visible to verify transfer.
4. Block as described for individual antibody.
5. Incubate in primary antibody.
6. Wash 4 x 5 min in TBST or PBST.
7. Incubate in secondary antibody.
8. Wash 4 x 5 min in TBST or PBST.
9. Incubate membrane for 5 min in Supersignal Detection Reagent.
10. Expose to film.
11. Develop film in Kodak X-Omat 2000 processor.
12. Image on Molecular Imager Gel Doc XR+ System (Biorad #170-8195).

**Western blotting protocols for individual antibodies:**

|                           |                                                                                    |                 |                |                    |             |
|---------------------------|------------------------------------------------------------------------------------|-----------------|----------------|--------------------|-------------|
| <b>Protein</b>            | <b>Nestin</b>                                                                      |                 |                |                    |             |
| <b>SDS-PAGE</b>           | 3-8% Tris-Acetate gel, Tris-Acetate-SDS running buffer, 150V constant, 70 min, 4°C |                 |                |                    |             |
| <b>Transfer/membrane</b>  | 0.45 um pore size Nitrocellulose, 30V constant, 1 hr, 4°C                          |                 |                |                    |             |
|                           | <b>Antibody</b>                                                                    | <b>Dilution</b> | <b>Diluent</b> | <b>Temperature</b> | <b>Time</b> |
| <b>Block</b>              | N/A                                                                                | N/A             | 5% BSA in TBST | 4°C                | 5 hr        |
| <b>Primary Antibody</b>   | NB300-266 (Novus Biologicals)                                                      | 1:5,000         | 1% BSA in TBST | 4°C                | Overnight   |
| <b>Secondary Antibody</b> | HAF007 (R&D Systems)                                                               | 1:10,000        | 1% BSA in TBST | RT                 | 1 hr        |

|                           |                                                                                    |                 |                 |                    |             |
|---------------------------|------------------------------------------------------------------------------------|-----------------|-----------------|--------------------|-------------|
| <b>Protein</b>            | <b>IQGAP1</b>                                                                      |                 |                 |                    |             |
| <b>SDS-PAGE</b>           | 3-8% Tris-Acetate gel, Tris-Acetate-SDS running buffer, 150V constant, 70 min, 4°C |                 |                 |                    |             |
| <b>Transfer/membrane</b>  | 0.45 um pore size Nitrocellulose, 30V constant, 1 hr, 4°C                          |                 |                 |                    |             |
|                           | <b>Antibody</b>                                                                    | <b>Dilution</b> | <b>Diluent</b>  | <b>Temperature</b> | <b>Time</b> |
| <b>Block</b>              | N/A                                                                                | N/A             | 5% NFDM in PBST | 4°C                | Overnight   |
| <b>Primary Antibody</b>   | ab109292 (Abcam)                                                                   | 1:5,000         | 5% NFDM in PBST | 4°C                | Overnight   |
| <b>Secondary Antibody</b> | Ab97051 (Abcam)                                                                    | 1:10,000        | 5% NFDM in PBST | RT                 | 1 hr        |

|                           |                                                                         |                 |                 |                    |             |
|---------------------------|-------------------------------------------------------------------------|-----------------|-----------------|--------------------|-------------|
| <b>Protein</b>            | <b>NAMPT</b>                                                            |                 |                 |                    |             |
| <b>SDS-PAGE</b>           | 4-12% Bis-Tris gel, MOPS-SDS running buffer, 200V constant, 70 min, 4°C |                 |                 |                    |             |
| <b>Transfer/membrane</b>  | 0.45 um pore size Nitrocellulose, 30V constant, 1 hr, 4°C               |                 |                 |                    |             |
|                           | <b>Antibody</b>                                                         | <b>Dilution</b> | <b>Diluent</b>  | <b>Temperature</b> | <b>Time</b> |
| <b>Block</b>              | N/A                                                                     | N/A             | 5% NFDM in TBST | RT                 | 1 hour      |
| <b>Primary Antibody</b>   | ab109292 (Abcam)                                                        | 1:5,000         | 5% NFDM in TBST | 4°C                | Overnight   |
| <b>Secondary Antibody</b> | ab97051 (Abcam)                                                         | 1:10,000        | 5% NFDM in TBST | RT                 | 1 hr        |

|                           |                                                                         |                 |                |                    |             |
|---------------------------|-------------------------------------------------------------------------|-----------------|----------------|--------------------|-------------|
| <b>Protein</b>            | <b>ANXA1</b>                                                            |                 |                |                    |             |
| <b>SDS-PAGE</b>           | 4-12% Bis-Tris gel, MOPS-SDS running buffer, 200V constant, 70 min, 4°C |                 |                |                    |             |
| <b>Transfer/membrane</b>  | Invitrolon PVDF, 30V constant, 1 hr, 4°C                                |                 |                |                    |             |
|                           | <b>Antibody</b>                                                         | <b>Dilution</b> | <b>Diluent</b> | <b>Temperature</b> | <b>Time</b> |
| <b>Block</b>              | N/A                                                                     | N/A             | 5% BSA in TBST | 4°C                | Overnight   |
| <b>Primary Antibody</b>   | 8691 (Cell Signaling Technologies)                                      | 1:5,000         | 5% BSA in TBST | 4°C                | Overnight   |
| <b>Secondary Antibody</b> | ab97051 (Abcam)                                                         | 1:20,000        | 5% BSA in TBST | RT                 | 1 hr        |

|                           |                                                                         |                 |                 |                    |             |
|---------------------------|-------------------------------------------------------------------------|-----------------|-----------------|--------------------|-------------|
| <b>Protein</b>            | <b>Peripherin</b>                                                       |                 |                 |                    |             |
| <b>SDS-PAGE</b>           | 4-12% Bis-Tris gel, MOPS-SDS running buffer, 200V constant, 70 min, 4°C |                 |                 |                    |             |
| <b>Transfer/membrane</b>  | 0.45 um pore size Nitrocellulose, 30V constant, 1 hr, 4°C               |                 |                 |                    |             |
|                           | <b>Antibody</b>                                                         | <b>Dilution</b> | <b>Diluent</b>  | <b>Temperature</b> | <b>Time</b> |
| <b>Block</b>              | N/A                                                                     | N/A             | 5% NFDM in TBST | RT                 | 1 hour      |
| <b>Primary Antibody</b>   | Sc-7604 (Santa Cruz Biotechnology, Inc.)                                | 1:1,000         | 5% NFDM in TBST | 4°C                | Overnight   |
| <b>Secondary Antibody</b> | Sc-2020 (Santa Cruz Biotechnology, Inc.)                                | 1:10,000        | 5% NFDM in TBST | RT                 | 1 hr        |

|                           |                                                                         |                 |                 |                    |             |
|---------------------------|-------------------------------------------------------------------------|-----------------|-----------------|--------------------|-------------|
| <b>Protein</b>            | <b>CATB</b>                                                             |                 |                 |                    |             |
| <b>SDS-PAGE</b>           | 4-12% Bis-Tris gel, MOPS-SDS running buffer, 200V constant, 70 min, 4°C |                 |                 |                    |             |
| <b>Transfer/membrane</b>  | Invitrolon PVDF, 30V constant, 1 hr, 4°C                                |                 |                 |                    |             |
|                           | <b>Antibody</b>                                                         | <b>Dilution</b> | <b>Diluent</b>  | <b>Temperature</b> | <b>Time</b> |
| <b>Block</b>              | N/A                                                                     | N/A             | 5% NFDM in PBST | RT                 | 1 hour      |
| <b>Primary Antibody</b>   | Ab58802 (Abcam)                                                         | 1:400           | 5% NFDM in PBST | 4°C                | Overnight   |
| <b>Secondary Antibody</b> | HAF007 (R&D Systems)                                                    | 1:10,000        | 5% NFDM in PBST | RT                 | 1 hr        |

|                           |                                                                         |                 |                |                    |             |
|---------------------------|-------------------------------------------------------------------------|-----------------|----------------|--------------------|-------------|
| <b>Protein</b>            | <b>FETUA</b>                                                            |                 |                |                    |             |
| <b>SDS-PAGE</b>           | 4-12% Bis-Tris gel, MOPS-SDS running buffer, 200V constant, 70 min, 4°C |                 |                |                    |             |
| <b>Transfer/membrane</b>  | Invitrolon PVDF, 30V constant, 1 hr, 4°C                                |                 |                |                    |             |
|                           | <b>Antibody</b>                                                         | <b>Dilution</b> | <b>Diluent</b> | <b>Temperature</b> | <b>Time</b> |
| <b>Block</b>              | N/A                                                                     | N/A             | 5% BSA in TBST | 4°C                | Overnight   |
| <b>Primary Antibody</b>   | ab137125 (Abcam)                                                        | 1:10,000        | 5% BSA in TBST | 4°C                | Overnight   |
| <b>Secondary Antibody</b> | ab97051 (Abcam)                                                         | 1:50,000        | 5% BSA in TBST | RT                 | 1 hr        |

|                                                                                                                                                                                                            |                       |                 |                 |                    |             |
|------------------------------------------------------------------------------------------------------------------------------------------------------------------------------------------------------------|-----------------------|-----------------|-----------------|--------------------|-------------|
| <b>Protein</b>                                                                                                                                                                                             | <b>β-actin</b>        |                 |                 |                    |             |
| Used as a loading control. Membranes were stripped with Restore Western Blot Stripping Buffer (Thermo Scientific) for 45 min at 37°C and rinsed for 5 min in TBST before proceeding with β-actin blotting. |                       |                 |                 |                    |             |
|                                                                                                                                                                                                            | <b>Antibody</b>       | <b>Dilution</b> | <b>Diluent</b>  | <b>Temperature</b> | <b>Time</b> |
| <b>Block</b>                                                                                                                                                                                               | N/A                   | N/A             | 5% NFDM in TBST | 4°C                | Overnight   |
| <b>Primary Antibody</b>                                                                                                                                                                                    | A2228 (Sigma-Aldrich) | 1:10,000        | 5% NFDM in TBST | 4°C                | Overnight   |
| <b>Secondary Antibody</b>                                                                                                                                                                                  | HAF007 (R&D Systems)  | 1:10,000        | 5% NFDM in TBST | RT                 | 1 hr        |

**Supplementary Table 1.**

| <b>Symbol</b> | <b>Name</b>                                                                   | <b>Total<br/>GBM<br/>Scans</b> | <b>Total<br/>EL<br/>Scans</b> | <b>Norm<br/>Log2<br/>Ratio</b> | <b>p value</b> |
|---------------|-------------------------------------------------------------------------------|--------------------------------|-------------------------------|--------------------------------|----------------|
| NEST          | Nestin                                                                        | 1651                           | 5                             | 7.95                           | 1.33E-35       |
| CD14          | Monocyte differentiation antigen                                              | 191                            | 2                             | 6.16                           | 6.68E-10       |
| LAC7          | Ig lambda-7 chain C region IGLC7                                              | 612                            | 10                            | 5.52                           | 1.32E-09       |
| LAC6          | Ig lambda-6 chain C region IGLC6                                              | 598                            | 10                            | 5.49                           | 1.01E-08       |
| ALS           | Insulin-like growth factor-binding protein complex acid labile subunit IGFALS | 176                            | 4                             | 5.04                           | 1.42E-41       |
| ITAM          | Integrin alpha-M ITGAM                                                        | 352                            | 9                             | 4.87                           | 1.85E-19       |
| VAT1          | Synaptic vesicle membrane protein VAT-1 homolog                               | 113                            | 3                             | 4.82                           | 5.02E-18       |
| IQGA1         | Ras GTPase-activating-like protein IQGAP1                                     | 1207                           | 37                            | 4.61                           | 1.15E-06       |
| NAMPT         | Nicotinamide phosphoribosyltransferase                                        | 1008                           | 33                            | 4.52                           | 1.15E-06       |
| STT3A         | Dolichyl-diphosphooligosaccharide--protein glycosyltransferase subunit        | 86                             | 3                             | 4.43                           | 1.17E-11       |
| SERPH         | Serpin H1 SERPINH1                                                            | 187                            | 7                             | 4.32                           | 4.39E-11       |
| TAGL2         | Transgelin-2                                                                  | 317                            | 12                            | 4.31                           | 4.42E-06       |
| VTNC          | Vitronectin VTN                                                               | 468                            | 19                            | 4.21                           | 9.28E-14       |
| LAMA4         | Laminin subunit alpha-4                                                       | 338                            | 14                            | 4.18                           | 1.7E-05        |
| LAC1          | Ig lambda-1 chain C regions IGLC1                                             | 186                            | 8                             | 4.12                           | 6.51E-13       |
| IGHG2         | Ig gamma-2 chain C region                                                     | 1779                           | 80                            | 4.06                           | 6.47E-05       |
| SAMH1         | SAM domain and HD domain-containing protein 1 SAMHD1                          | 133                            | 6                             | 4.05                           | 7.84E-19       |
| A2AP          | Alpha-2-antiplasmin SERPINF2                                                  | 688                            | 34                            | 3.92                           | 0.000126       |
| ANXA1         | Annexin A1                                                                    | 1388                           | 69                            | 3.91                           | 3.12E-11       |
| F13A          | Coagulation factor XIII A chain F13A1                                         | 637                            | 33                            | 3.85                           | 3.12E-11       |
| CO5           | Complement C5                                                                 | 459                            | 24                            | 3.84                           | 1.13E-07       |
| IGLL5         | Immunoglobulin lambda-like polypeptide 5                                      | 200                            | 11                            | 3.77                           | 1.13E-07       |
| PERI          | Peripherin PRPH                                                               | 140                            | 8                             | 3.71                           | 0.000245       |
| LAMB1         | Laminin subunit beta-1                                                        | 172                            | 10                            | 3.69                           | 0.000245       |
| IGHG4         | Ig gamma-4 chain C region                                                     | 546                            | 32                            | 3.68                           | 7.64E-10       |
| CO3A1         | Collagen alpha-1(III) chain COL3A1                                            | 136                            | 8                             | 3.67                           | 7.46E-32       |
| FLNC          | Filamin-C                                                                     | 2792                           | 168                           | 3.64                           | 5.66E-15       |
| IGHG3         | Ig gamma-3 chain C region                                                     | 632                            | 39                            | 3.60                           | 1.48E-06       |
| TENA          | Tenascin TNC                                                                  | 1926                           | 126                           | 3.52                           | 3.48E-11       |
| LUM           | Lumican                                                                       | 235                            | 16                            | 3.46                           | 2.81E-06       |
| CLIC4         | Chloride intracellular channel protein 4                                      | 101                            | 7                             | 3.44                           | 2.42E-13       |
| LAC3          | Ig lambda-3 chain C regions IGLC3                                             | 991                            | 71                            | 3.39                           | 1.22E-10       |
| LAC2          | Ig lambda-2 chain C regions IGLC2                                             | 990                            | 71                            | 3.39                           | 4.4E-57        |
| LAMP1         | Lysosome-associated membrane glycoprotein 1                                   | 152                            | 11                            | 3.37                           | 4.23E-10       |
| NP1L1         | Nucleosome assembly protein 1-like 1                                          | 151                            | 11                            | 3.36                           | 4.23E-10       |
| APOE          | Apolipoprotein E                                                              | 662                            | 51                            | 3.28                           | 6.35E-08       |

|       |                                                                             |      |      |      |          |
|-------|-----------------------------------------------------------------------------|------|------|------|----------|
| PSME2 | Proteasome activator complex subunit 2                                      | 227  | 18   | 3.24 | 6.35E-08 |
| CPNS1 | Calpain small subunit 1 CAPNS1                                              | 63   | 5    | 3.24 | 1E-05    |
| IGKC  | Ig kappa chain C region                                                     | 2278 | 182  | 3.23 | 0.001792 |
| DPYD  | Dihydropyrimidine dehydrogenase [NADP(+)]                                   | 62   | 5    | 3.22 | 3.84E-29 |
| ANT3  | Antithrombin-III SERPINC1                                                   | 859  | 70   | 3.20 | 5.24E-27 |
| LTBP1 | Latent-transforming growth factor $\beta$ -binding protein 1                | 85   | 7    | 3.19 | 5.37E-12 |
| LEG1  | Galectin-1 LGALS1                                                           | 779  | 69   | 3.08 | 1.19E-07 |
| FINC  | Fibronectin FN1                                                             | 4060 | 362  | 3.07 | 2.02E-25 |
| ROA1  | Heterogeneous nuclear ribonucleoprotein A1<br>HNRNPA1                       | 163  | 15   | 3.03 | 2.02E-25 |
| COIA1 | Collagen alpha-1(XVIII) chain COL18A1                                       | 194  | 18   | 3.01 | 1.84E-11 |
| ITIH1 | Inter-alpha-trypsin inhibitor heavy chain H1                                | 1156 | 111  | 2.96 | 6.26E-11 |
| CLUS  | Clusterin CLU                                                               | 983  | 95   | 2.96 | 5E-09    |
| PROS  | Vitamin K-dependent protein S PROS1                                         | 81   | 8    | 2.92 | 3.56E-05 |
| HRG   | Histidine-rich glycoprotein                                                 | 706  | 74   | 2.84 | 3.56E-05 |
| CATB  | Cathepsin B CTSB                                                            | 180  | 19   | 2.83 | 0.003461 |
| ANXA2 | Annexin A2                                                                  | 790  | 86   | 2.78 | 9.24E-09 |
| AFAM  | Afamin AFM                                                                  | 211  | 23   | 2.78 | 1.99E-17 |
| FCGBP | IgGFc-binding protein                                                       | 100  | 11   | 2.77 | 1.7E-08  |
| CR2   | Complement receptor type 2                                                  | 63   | 7    | 2.75 | 6.67E-05 |
| ITIH2 | Inter-alpha-trypsin inhibitor heavy chain H2                                | 1694 | 189  | 2.75 | 6.67E-05 |
| FETUA | Alpha-2-HS-glycoprotein AHSG                                                | 133  | 15   | 2.73 | 1.94E-27 |
| FIBB  | Fibrinogen beta chain FGB                                                   | 4833 | 578  | 2.65 | 0.000125 |
| THRB  | Prothrombin F2                                                              | 165  | 20   | 2.63 | 0.006664 |
| ANGT  | Angiotensinogen AGT                                                         | 488  | 60   | 2.61 | 0.006664 |
| AKP13 | A-kinase anchor protein 13 AKAP13                                           | 250  | 31   | 2.60 | 0.006664 |
| RPN2  | Dolichyl-diphosphooligosaccharide--protein<br>glycosyltransferase subunit 2 | 298  | 38   | 2.56 | 1.05E-07 |
| AMPL  | Cytosol aminopeptidase LAP3                                                 | 405  | 53   | 2.52 | 4.81E-06 |
| AXA2L | Putative annexin A2-like protein ANXA2P2                                    | 508  | 67   | 2.51 | 4.34E-09 |
| VIME  | Vimentin VIM                                                                | 9652 | 1300 | 2.48 | 8.83E-06 |
| CO6A3 | Collagen alpha-3(VI) chain COL6A3                                           | 3034 | 419  | 2.44 | 8.83E-06 |
| PDIA1 | Protein disulfide-isomerase P4HB                                            | 724  | 100  | 2.44 | 2.71E-20 |
| IGHG1 | Ig gamma-1 chain C region                                                   | 2335 | 325  | 2.43 | 1.16E-31 |
| RLA1  | 60S acidic ribosomal protein P1 RPLP1                                       | 100  | 14   | 2.42 | 4.05E-24 |
| GPX1  | Glutathione peroxidase 1                                                    | 85   | 12   | 2.41 | 3.7E-54  |
| TSNAX | Translin-associated protein X                                               | 63   | 9    | 2.39 | 6.39E-07 |
| SHOT1 | Shootin-1 KIAA1598                                                          | 278  | 40   | 2.38 | 1.62E-05 |
| IC1   | Plasma protease C1 inhibitor SERPING1                                       | 582  | 84   | 2.38 | 0.00043  |
| ITIH4 | Inter-alpha-trypsin inhibitor heavy chain H4                                | 567  | 88   | 2.27 | 0.012792 |
| IGHA2 | Ig alpha-2 chain C region                                                   | 219  | 34   | 2.27 | 0.012792 |
| RL6   | 60S ribosomal protein L6 RPL6                                               | 154  | 24   | 2.27 | 4.69E-08 |



|       |                                                                              |      |      |      |          |
|-------|------------------------------------------------------------------------------|------|------|------|----------|
| DYH5  | Dynein heavy chain 5, axonemal DNAH5                                         | 526  | 82   | 2.27 | 6.13E-12 |
| PGBM  | Basement membrane-specific heparan sulfate proteoglycan core protein HSPG2   | 706  | 111  | 2.25 | 1.16E-06 |
| PTN13 | Tyrosine-protein phosphatase non-receptor type 13 PTPN13                     | 76   | 12   | 2.25 | 2.95E-05 |
| BAI2  | Brain-specific angiogenesis inhibitor 2                                      | 1586 | 267  | 2.15 | 2.95E-05 |
| TLR1  | Toll-like receptor 1                                                         | 59   | 10   | 2.14 | 2.73E-15 |
| CERU  | Ceruloplasmin CP                                                             | 1458 | 249  | 2.13 | 6.35E-14 |
| CLIP1 | CAP-Gly domain-containing linker protein 1                                   | 138  | 24   | 2.11 | 1.96E-11 |
| FLNB  | Filamin-B                                                                    | 681  | 123  | 2.05 | 2.1E-06  |
| SODM  | Superoxide dismutase [Mn], mitochondrial SOD2                                | 601  | 110  | 2.03 | 0.000795 |
| COPB2 | Coatomer subunit beta'                                                       | 152  | 28   | 2.02 | 3.23E-45 |
| AOFB  | Amine oxidase [flavin-containing] B MAOB                                     | 1261 | 238  | 1.99 | 5.37E-05 |
| 1C18  | HLA class I histocompatibility antigen, Cw-18 alpha chain HLA-C              | 90   | 17   | 1.99 | 2.73E-07 |
| MAGI3 | Membrane-associated guanylate kinase, WW and PDZ domain-containing protein 3 | 116  | 22   | 1.98 | 2E-08    |
| STOM  | Erythrocyte band 7 integral membrane protein                                 | 427  | 81   | 1.98 | 2E-08    |
| ZHX3  | Zinc fingers and homeoboxes protein 3                                        | 219  | 42   | 1.97 | 6.8E-06  |
| RBM27 | RNA-binding protein 27                                                       | 67   | 13   | 1.95 | 0.001464 |
| AACT  | Alpha-1-antichymotrypsin SERPINA3                                            | 1288 | 254  | 1.93 | 0.001464 |
| FLNA  | Filamin-A                                                                    | 5408 | 1096 | 1.89 | 0.024456 |
| CFAH  | Complement factor H CFH                                                      | 330  | 67   | 1.88 | 0.024456 |
| RAB5C | Ras-related protein Rab-5C                                                   | 123  | 25   | 1.88 | 0.024456 |
| APMAP | Adipocyte plasma membrane-associated protein                                 | 170  | 35   | 1.86 | 0.024456 |
| IF5A1 | Eukaryotic translation initiation factor 5A-1 EIF5A                          | 165  | 34   | 1.86 | 2.08E-26 |
| BIEA  | Biliverdin reductase A BLVRA                                                 | 82   | 17   | 1.85 | 8.16E-11 |
| FKBP5 | Peptidyl-prolyl cis-trans isomerase FKBP5                                    | 106  | 22   | 1.85 | 0.000176 |
| FIBG  | Fibrinogen gamma chain FGG                                                   | 5122 | 1066 | 1.85 | 1.09E-09 |
| PR14L | Protein PRR14L PRR14L                                                        | 66   | 14   | 1.82 | 0.002679 |
| MYH7  | Myosin-7                                                                     | 146  | 31   | 1.82 | 0.002679 |
| IGHA1 | Ig alpha-1 chain C region                                                    | 639  | 137  | 1.81 | 0.002679 |
| PUR2  | Trifunctional purine biosynthetic protein adenosine-3 GART                   | 132  | 29   | 1.77 | 0.002679 |
| SYWC  | Tryptophan--tRNA ligase, cytoplasmic WARS                                    | 335  | 74   | 1.76 | 2.75E-06 |
| TRFE  | Serotransferrin TF                                                           | 3428 | 759  | 1.76 | 8.31E-18 |
| CO6A1 | Collagen alpha-1(VI) chain COL6A1                                            | 1130 | 251  | 1.75 | 0.000316 |
| SLIT3 | Slit homolog 3 protein                                                       | 252  | 56   | 1.75 | 4.23E-60 |
| DAAM1 | Disheveled-associated activator of morphogenesis 1                           | 72   | 16   | 1.75 | 3.87E-05 |
| NAGK  | N-acetyl-D-glucosamine kinase                                                | 63   | 14   | 1.75 | 3.87E-05 |
| ATAD2 | ATPase family AAA domain-containing protein 2                                | 54   | 12   | 1.75 | 3.87E-05 |
| ECH1  | Delta(3,5)-Delta(2,4)-dienoyl-CoA isomerase, mitochondrial                   | 121  | 27   | 1.75 | 4.85E-06 |
| APOA1 | Apolipoprotein A-I                                                           | 1425 | 319  | 1.74 | 4.85E-06 |

|       |                                                      |       |      |      |          |
|-------|------------------------------------------------------|-------|------|------|----------|
| CPNE1 | Copine-1                                             | 155   | 35   | 1.73 | 7.95E-08 |
| A1AT  | Alpha-1-antitrypsin SERPINA1                         | 3461  | 793  | 1.71 | 7.95E-08 |
| IGHM  | Ig mu chain C region                                 | 1010  | 232  | 1.71 | 1.93E-21 |
| ALBU  | Serum albumin ALB                                    | 37159 | 8627 | 1.69 | 1.35E-09 |
| APOB  | Apolipoprotein B-100                                 | 2660  | 619  | 1.69 | 3.34E-21 |
| DESM  | Desmin DES                                           | 1194  | 278  | 1.69 | 4.11E-13 |
| MVP   | Major vault protein                                  | 334   | 78   | 1.68 | 3.02E-53 |
| FIBA  | Fibrinogen alpha chain FGA                           | 7012  | 1646 | 1.68 | 1.03E-35 |
| IF5A2 | Eukaryotic translation initiation factor 5A-2 EIF5A2 | 97    | 23   | 1.66 | 8.54E-06 |
| ITB1  | Integrin beta-1 ITGB1                                | 354   | 84   | 1.66 | 8.54E-06 |
| DECR  | 2,4-dienoyl-CoA reductase, mitochondrial DECR1       | 188   | 45   | 1.65 | 0.000565 |
| FEZF2 | Fez family zinc finger protein 2                     | 124   | 30   | 1.63 | 0.004876 |
| PDIA6 | Protein disulfide-isomerase A6                       | 336   | 82   | 1.62 | 0.004876 |
| MOGS  | Mannosyl-oligosaccharide glucosidase                 | 127   | 31   | 1.62 | 0.046526 |
| GP179 | Probable G-protein coupled receptor 179 GPR179       | 292   | 72   | 1.60 | 0.046526 |
| ASAH1 | Acid ceramidase                                      | 232   | 58   | 1.58 | 0.046526 |
| H1T   | Histone H1t HIST1H1T                                 | 104   | 26   | 1.58 | 2.92E-15 |
| HSPB1 | Heat shock protein beta-1                            | 542   | 136  | 1.58 | 3.77E-14 |
| HBE   | Hemoglobin subunit epsilon HBE1                      | 1418  | 357  | 1.57 | 8.72E-20 |
| HBG1  | Hemoglobin subunit gamma-1                           | 1575  | 412  | 1.52 | 4.23E-60 |
| HBG2  | Hemoglobin subunit gamma-2                           | 1550  | 406  | 1.52 | 5.43E-08 |
| CO4A  | Complement C4-A C4A                                  | 1508  | 404  | 1.48 | 0.000121 |
| CO4B  | Complement C4-B C4B                                  | 1480  | 397  | 1.48 | 2.56E-14 |
| PRKDC | DNA-dependent protein kinase catalytic subunit       | 737   | 200  | 1.47 | 0.001005 |
| DNMT1 | DNA (cytosine-5)-methyltransferase 1                 | 92    | 25   | 1.46 | 0.001005 |
| PIIB  | Peptidyl-prolyl cis-trans isomerase B                | 287   | 78   | 1.46 | 2.75E-09 |
| RGS3  | Regulator of G-protein signaling 3                   | 91    | 25   | 1.45 | 0.000912 |
| PIGS  | GPI transamidase component PIG-S                     | 79    | 22   | 1.43 | 5.72E-06 |
| MCR   | Mineralocorticoid receptor NR3C2                     | 50    | 14   | 1.42 | 5.72E-06 |
| G3P   | Glyceraldehyde-3-phosphate dehydrogenase GAPDH       | 7935  | 2230 | 1.42 | 0.008818 |
| ITPR2 | Inositol 1,4,5-trisphosphate receptor type 2         | 64    | 18   | 1.41 | 0.008818 |
| IF4A1 | Eukaryotic initiation factor 4A-I EIF4A1             | 195   | 55   | 1.41 | 0.008818 |
| GFAP  | Glial fibrillary acidic protein                      | 19103 | 5403 | 1.41 | 0.008818 |
| ZA2G  | Zinc-alpha-2-glycoprotein AZGP1                      | 105   | 30   | 1.39 | 0.008818 |
| FHR1  | Complement factor H-related protein 1 CFHR1          | 80    | 23   | 1.38 | 1.86E-31 |
| CO3   | Complement C3 C3                                     | 5914  | 1704 | 1.38 | 9E-16    |
| VINC  | Vinculin VCL                                         | 1081  | 313  | 1.37 | 9.62E-13 |
| H11   | Histone H1.1 HIST1H1A                                | 93    | 27   | 1.37 | 2.19E-13 |
| DIAP2 | Protein diaphanous homolog 2 DIAPH2                  | 86    | 25   | 1.37 | 4.56E-05 |
| ANXA5 | Annexin A5                                           | 1754  | 517  | 1.35 | 4.56E-05 |
| APC5  | Anaphase-promoting complex subunit 5 ANAPC5          | 189   | 56   | 1.34 | 4.87E-35 |

|        |                                                                             |      |      |      |          |
|--------|-----------------------------------------------------------------------------|------|------|------|----------|
| GPTC8  | G patch domain-containing protein 8 GPATCH8                                 | 87   | 26   | 1.33 | 2.49E-18 |
| UGGG1  | UDP-glucose:glycoprotein glucosyltransferase 1<br>UGGT1                     | 218  | 66   | 1.31 | 4.09E-21 |
| PZP    | Pregnancy zone protein                                                      | 579  | 176  | 1.30 | 4.11E-10 |
| PROF1  | Profilin-1 PFN1                                                             | 455  | 139  | 1.29 | 4.11E-10 |
| RLA0L  | 60S acidic ribosomal protein P0-like RPLP0P6                                | 121  | 37   | 1.29 | 0.001778 |
| SYCP1  | Synaptonemal complex protein 1                                              | 85   | 26   | 1.29 | 0.001778 |
| ARHGB  | Rho guanine nucleotide exchange factor 11<br>ARHGEF11                       | 127  | 39   | 1.29 | 0.001778 |
| FBW10  | F-box/WD repeat-containing protein 10 FBXW10                                | 292  | 90   | 1.28 | 0.001778 |
| GCN1L  | Translational activator GCN1 GCN1L1                                         | 152  | 47   | 1.28 | 1.72E-30 |
| NDRG1  | Protein NDRG1                                                               | 106  | 33   | 1.27 | 2.1E-11  |
| TAF1   | Transcription initiation factor TFIID subunit 1                             | 99   | 31   | 1.26 | 0.000371 |
| TPP1   | Tripeptidyl-peptidase 1                                                     | 185  | 58   | 1.26 | 0.000371 |
| LAMC1  | Laminin subunit gamma-1                                                     | 604  | 190  | 1.25 | 1.58E-10 |
| A2MG   | Alpha-2-macroglobulin A2M                                                   | 4032 | 1282 | 1.24 | 8.06E-12 |
| H2B3B  | Histone H2B type 3-B HIST3H2BB                                              | 1107 | 353  | 1.23 | 7.89E-05 |
| DOCK4  | Dedicator of cytokinesis protein 4                                          | 47   | 15   | 1.23 | 1.71E-05 |
| MLL1   | Histone-lysine N-methyltransferase MLL MLL                                  | 75   | 24   | 1.23 | 6.04E-11 |
| MOES   | Moesin MSN                                                                  | 2303 | 737  | 1.23 | 1.82E-32 |
| MYO1E  | Unconventional myosin-Ie                                                    | 228  | 73   | 1.23 | 1.73E-10 |
| TIGD1  | Tigger transposable element-derived protein 1                               | 618  | 198  | 1.23 | 7.67E-10 |
| CO1A1  | Collagen alpha-1(I) chain COL1A1                                            | 783  | 253  | 1.21 | 1.52E-08 |
| VP33A  | Vacuolar protein sorting-associated protein 33A<br>VPS33A                   | 83   | 27   | 1.20 | 6.36E-06 |
| PRDX4  | Peroxiredoxin-4                                                             | 193  | 63   | 1.20 | 2.92E-05 |
| CRYAB  | Alpha-crystallin B chain                                                    | 1150 | 377  | 1.19 | 0.000136 |
| H2BFS  | Histone H2B type F-S                                                        | 1180 | 387  | 1.19 | 0.000644 |
| H2B1K  | Histone H2B type 1-K HIST1H2BK                                              | 1179 | 387  | 1.19 | 0.015826 |
| H2B1L  | Histone H2B type 1-L HIST1H2BL                                              | 1181 | 389  | 1.19 | 0.015826 |
| ATR    | Serine/threonine-protein kinase ATR                                         | 197  | 65   | 1.18 | 0.015826 |
| KIF4A  | Chromosome-associated kinesin KIF4A                                         | 178  | 59   | 1.18 | 0.015826 |
| SETX   | Probable helicase senataxin                                                 | 235  | 78   | 1.18 | 0.015826 |
| LAMP2  | Lysosome-associated membrane glycoprotein 2                                 | 241  | 80   | 1.18 | 0.015826 |
| VIGLN  | Vigilin HDLBP                                                               | 108  | 36   | 1.17 | 0.015826 |
| KIF16B | Kinesin-like protein KIF16B KIF16B                                          | 54   | 18   | 1.17 | 0.015826 |
| FRIL   | Ferritin light chain FTL                                                    | 1425 | 477  | 1.16 | 0.015826 |
| H2B1B  | Histone H2B type 1-B HIST1H2BB                                              | 1150 | 387  | 1.16 | 0.015826 |
| H2B1J  | Histone H2B type 1-J HIST1H2BJ                                              | 1149 | 387  | 1.15 | 0.087976 |
| DIC    | Mitochondrial dicarboxylate carrier SLC25A10                                | 86   | 29   | 1.15 | 0.087976 |
| SND1   | Staphylococcal nuclease domain-containing protein 1                         | 184  | 63   | 1.13 | 0.087976 |
| RPN1   | Dolichyl-diphosphooligosaccharide--protein<br>glycosyltransferase subunit 1 | 294  | 101  | 1.13 | 0.087976 |

|       |                                                             |       |      |      |          |
|-------|-------------------------------------------------------------|-------|------|------|----------|
| ROA2  | Heterogeneous nuclear ribonucleoproteins A2/B1<br>HNRNPA2B1 | 293   | 101  | 1.12 | 0.087976 |
| SPG17 | Sperm-associated antigen 17 SPAG17                          | 75    | 26   | 1.11 | 1.67E-34 |
| RDH12 | Retinol dehydrogenase 12                                    | 137   | 48   | 1.10 | 8.4E-63  |
| MYH9  | Myosin-9                                                    | 5235  | 1838 | 1.09 | 2.17E-09 |
| SSX2  | Protein SSX2                                                | 981   | 348  | 1.08 | 2.14E-12 |
| HBB   | Hemoglobin subunit beta                                     | 10162 | 3616 | 1.07 | 4.99E-05 |
| GOGA4 | Golgin subfamily A member 4 GOLGA4                          | 59    | 21   | 1.07 | 0.000233 |
| MYH8  | Myosin-8                                                    | 140   | 50   | 1.07 | 0.000233 |
| PYGL  | Glycogen phosphorylase, liver form                          | 355   | 127  | 1.07 | 8.2E-10  |
| YES   | Tyrosine-protein kinase Yes YES1                            | 117   | 42   | 1.06 | 8.81E-07 |
| PININ | Pinin PNN                                                   | 242   | 87   | 1.06 | 0.000912 |
| KDIS  | Kinase D-interacting substrate of 220 kDa KIDINS220         | 69    | 25   | 1.05 | 2.91E-20 |
| ENAM  | Enamelin                                                    | 66    | 24   | 1.04 | 4.01E-06 |
| 6PGL  | 6-phosphogluconolactonase PGLS                              | 90    | 33   | 1.03 | 0.001112 |
| PDIA3 | Protein disulfide-isomerase A3                              | 408   | 150  | 1.03 | 0.001112 |
| C8AP2 | CASP8-associated protein 2 CASP8AP2                         | 151   | 56   | 1.02 | 1.36E-12 |
| IRPL1 | Interleukin-1 receptor accessory protein-like 1<br>IL1RAPL1 | 102   | 38   | 1.01 | 1.05E-17 |
| GSTP1 | Glutathione S-transferase P                                 | 539   | 202  | 1.00 | 0.000912 |
| RADI  | Radixin RDX                                                 | 1745  | 655  | 1.00 | 1.01E-14 |
| H13   | Histone H1.3 HIST1H1D                                       | 239   | 91   | 0.98 | 8.49E-05 |
| NIN   | Ninein                                                      | 42    | 16   | 0.98 | 0.005452 |
| HBD   | Hemoglobin subunit delta                                    | 3706  | 1423 | 0.97 | 8.54E-13 |
| PLSL  | Plastin-2 LCP1                                              | 304   | 117  | 0.96 | 6.36E-15 |
| TLN1  | Talin-1                                                     | 2654  | 1024 | 0.96 | 6.75E-06 |
| ASPD  | Putative L-aspartate dehydrogenase ASPDH                    | 399   | 154  | 0.96 | 4.56E-08 |
| NB5R3 | NADH-cytochrome b5 reductase 3 CYB5R3                       | 229   | 89   | 0.95 | 3.1E-05  |
| TM236 | Transmembrane protein 236 TMEM236                           | 72    | 28   | 0.95 | 1.43E-38 |
| HEMO  | Hemopexin HPX                                               | 303   | 119  | 0.93 | 1.13E-05 |
| PYR1  | CAD protein CAD                                             | 180   | 71   | 0.93 | 1.13E-05 |
| CO1A2 | Collagen alpha-2(I) chain COL1A2                            | 685   | 273  | 0.91 | 0.001908 |
| LMBL3 | Lethal(3)malignant brain tumor-like protein 3<br>L3MBTL3    | 303   | 121  | 0.91 | 0.001908 |
| PCBP1 | Poly(rC)-binding protein 1                                  | 120   | 48   | 0.91 | 0.001908 |
| MDN1  | Midasin                                                     | 120   | 48   | 0.91 | 0.001908 |
| CO6A2 | Collagen alpha-2(VI) chain COL6A2                           | 585   | 236  | 0.89 | 0.028161 |
| EIF3A | Eukaryotic translation initiation factor 3 subunit A        | 270   | 109  | 0.89 | 0.028161 |
| 6PGD  | 6-phosphogluconate dehydrogenase, decarboxylating<br>PGD    | 435   | 177  | 0.88 | 0.028161 |
| ARPC3 | Actin-related protein 2/3 complex subunit 3                 | 221   | 91   | 0.86 | 0.028161 |
| H4    | Histone H4 HIST1H4A                                         | 570   | 235  | 0.86 | 0.028161 |
| TRIPB | Thyroid receptor-interacting protein 11 TRIP11              | 80    | 33   | 0.86 | 0.028161 |

|       |                                                                                    |       |      |      |          |
|-------|------------------------------------------------------------------------------------|-------|------|------|----------|
| HPT   | Haptoglobin HP                                                                     | 379   | 157  | 0.86 | 0.028161 |
| COPA  | Coatomer subunit alpha                                                             | 328   | 137  | 0.84 | 0.028161 |
| MUCB  | Ig mu heavy chain disease protein                                                  | 215   | 90   | 0.84 | 0.028161 |
| SF3B3 | Splicing factor 3B subunit 3                                                       | 143   | 60   | 0.84 | 0.028161 |
| SVEP1 | Sushi, von Willebrand factor type A, EGF and pentraxin domain-containing protein 1 | 40    | 17   | 0.82 | 0.028161 |
| KI67  | Antigen KI-67 MKI67                                                                | 215   | 92   | 0.81 | 0.028161 |
| PCX1  | Pecanex-like protein 1 PCNX                                                        | 259   | 111  | 0.81 | 1.91E-28 |
| KAD7  | Adenylate kinase 7 AK7                                                             | 330   | 142  | 0.80 | 2.8E-25  |
| PGM1  | Phosphoglucomutase-1                                                               | 545   | 235  | 0.80 | 8.16E-17 |
| CANB2 | Calcineurin subunit B type 2 PPP3R2                                                | 88    | 38   | 0.80 | 4.16E-06 |
| CDC42 | Cell division control protein 42 homolog                                           | 395   | 171  | 0.79 | 0.000676 |
| CAP1  | Adenylyl cyclase-associated protein 1                                              | 736   | 319  | 0.79 | 0.000676 |
| TAF1L | Transcription initiation factor TFIID subunit 1-like                               | 117   | 51   | 0.78 | 1.48E-68 |
| H2AV  | Histone H2A.V H2AFV                                                                | 342   | 151  | 0.76 | 6.92E-06 |
| GANAB | Neutral alpha-glucosidase AB                                                       | 543   | 240  | 0.76 | 6.92E-06 |
| ADHX  | Alcohol dehydrogenase class-3 ADH5                                                 | 95    | 42   | 0.76 | 0.000242 |
| H2AZ  | Histone H2A.Z H2AFZ                                                                | 341   | 151  | 0.76 | 0.000242 |
| FNTA  | Protein farnesyltransferase/geranylgeranyltransferase type-1 subunit alpha         | 88    | 39   | 0.76 | 0.000242 |
| H14   | Histone H1.4 HIST1H1E                                                              | 200   | 89   | 0.75 | 0.009437 |
| RN213 | E3 ubiquitin-protein ligase RNF213 RNF213                                          | 193   | 86   | 0.75 | 0.009437 |
| XPO5  | Exportin-5                                                                         | 105   | 47   | 0.74 | 0.009437 |
| MINT  | Msx2-interacting protein SPEN                                                      | 58    | 26   | 0.74 | 7.62E-11 |
| RLA0  | 60S acidic ribosomal protein P0 RPLP0                                              | 185   | 84   | 0.72 | 8.7E-05  |
| GELS  | Gelsolin GSN                                                                       | 2736  | 1244 | 0.72 | 5.63E-13 |
| AOFA  | Amine oxidase [flavin-containing] A MAOA                                           | 268   | 122  | 0.72 | 3.15E-05 |
| ASML  | N-acetylserotonin O-methyltransferase-like protein ASMTL                           | 449   | 205  | 0.72 | 3.15E-05 |
| HBA   | Hemoglobin subunit alpha HBA1                                                      | 10762 | 4920 | 0.71 | 0.003249 |
| AL4A1 | Delta-1-pyrroline-5-carboxylate dehydrogenase, mitochondrial ALDH4A1               | 480   | 220  | 0.71 | 2.75E-46 |
| HNRDL | Heterogeneous nuclear ribonucleoprotein D-like HNRPDL                              | 133   | 61   | 0.71 | 1.27E-07 |
| CO4A2 | Collagen alpha-2(IV) chain COL4A2                                                  | 218   | 100  | 0.71 | 1.15E-05 |
| UB2L3 | Ubiquitin-conjugating enzyme E2 L3 UBE2L3                                          | 137   | 63   | 0.70 | 0.000912 |
| R3HD2 | R3H domain-containing protein 2 R3HDM2                                             | 374   | 172  | 0.70 | 2.41E-09 |
| PLXB1 | Plexin-B1 PLXNB1                                                                   | 50    | 23   | 0.70 | 3.8E-39  |
| FYN   | Tyrosine-protein kinase Fyn                                                        | 89    | 41   | 0.70 | 5.66E-07 |
| DJC13 | DnaJ homolog subfamily C member 13 DNAJC13                                         | 78    | 36   | 0.70 | 0.000145 |
| GBRL3 | Gamma-aminobutyric acid receptor-associated protein-like 3 GABARAPL3               | 171   | 79   | 0.70 | 2.85E-08 |
| EZRI  | Ezrin EZR                                                                          | 1725  | 797  | 0.70 | 1E-22    |
| MYL6  | Myosin light polypeptide 6                                                         | 380   | 177  | 0.69 | 1.06E-08 |

|       |                                                      |      |      |      |          |
|-------|------------------------------------------------------|------|------|------|----------|
| SAHH  | Adenosylhomocysteinase AHCY                          | 241  | 113  | 0.68 | 5.22E-05 |
| GLU2B | Glucosidase 2 subunit beta PRKCSH                    | 260  | 122  | 0.68 | 1.19E-17 |
| CP135 | Centrosomal protein of 135 kDa CEP135                | 104  | 49   | 0.67 | 3.41E-07 |
| ZN638 | Zinc finger protein 638 ZNF638                       | 61   | 29   | 0.66 | 1.26E-07 |
| DMD   | Dystrophin                                           | 84   | 40   | 0.65 | 2.08E-20 |
| AHNK  | Neuroblast differentiation-associated protein AHNAK  | 1516 | 727  | 0.64 | 2.24E-27 |
| POTEE | POTE ankyrin domain family member E                  | 2073 | 1002 | 0.63 | 4.13E-15 |
| POTEF | POTE ankyrin domain family member F                  | 2071 | 1002 | 0.63 | 1.91E-32 |
| MYH13 | Myosin-13                                            | 93   | 45   | 0.63 | 2.77E-11 |
| YJ005 | Uncharacterized protein FLJ45252                     | 156  | 76   | 0.62 | 3.86E-09 |
| RS16  | 40S ribosomal protein S16 RPS16                      | 152  | 75   | 0.60 | 3.11E-05 |
| SRC   | Proto-oncogene tyrosine-protein kinase Src           | 85   | 42   | 0.60 | 8.61E-05 |
| HNRPD | Heterogeneous nuclear ribonucleoprotein D0<br>HNRNPD | 220  | 109  | 0.60 | 0.000672 |
| HCK   | Tyrosine-protein kinase HCK                          | 111  | 55   | 0.60 | 0.001907 |
| PSA2  | Proteasome subunit alpha type-2 PSMA2                | 115  | 57   | 0.60 | 0.005492 |
| KPYM  | Pyruvate kinase isozymes M1/M2 PKM                   | 5573 | 2764 | 0.60 | 0.005492 |
| AGRIN | Agrin AGRN                                           | 195  | 97   | 0.59 | 0.005492 |
| ACTB  | Actin, cytoplasmic 1                                 | 8991 | 4489 | 0.59 | 0.016188 |
| ACTG  | Actin, cytoplasmic 2 ACTG1                           | 8991 | 4489 | 0.59 | 0.016188 |
| DYH11 | Dynein heavy chain 11, axonemal DNAH11               | 378  | 190  | 0.58 | 0.016188 |
| S100B | Protein S100-B                                       | 584  | 294  | 0.57 | 0.049601 |
| HNRPK | Heterogeneous nuclear ribonucleoprotein K            | 403  | 204  | 0.57 | 0.049601 |
| H2A1C | Histone H2A type 1-C HIST1H2AC                       | 612  | 312  | 0.56 | 0.049601 |
| H2A3  | Histone H2A type 3 HIST3H2A                          | 612  | 312  | 0.56 | 0.049601 |
| POTEI | POTE ankyrin domain family member I                  | 1315 | 672  | 0.55 | 0.049601 |
| H2A1H | Histone H2A type 1-H HIST1H2AH                       | 609  | 312  | 0.55 | 0.049601 |
| CBR3  | Carbonyl reductase [NADPH] 3                         | 231  | 119  | 0.54 | 0.049601 |
| B3AT  | Band 3 anion transport protein SLC4A1                | 922  | 475  | 0.54 | 0.049601 |
| CALX  | Calnexin CANX                                        | 874  | 451  | 0.54 | 3.87E-26 |
| CAH2  | Carbonic anhydrase 2 CA2                             | 495  | 256  | 0.54 | 8.76E-13 |
| TANC1 | Protein TANC1                                        | 109  | 57   | 0.52 | 3.95E-41 |
| TCPE  | T-complex protein 1 subunit epsilon CCT5             | 258  | 135  | 0.52 | 3.26E-27 |
| XRCC5 | X-ray repair cross-complementing protein 5           | 378  | 198  | 0.52 | 4.53E-32 |
| H2AJ  | Histone H2A.J H2AFJ                                  | 616  | 323  | 0.52 | 1.01E-08 |
| UBB   | Polyubiquitin-B                                      | 4899 | 2584 | 0.51 | 4.6E-17  |
| KC1E  | Casein kinase I isoform epsilon CSNK1E               | 618  | 327  | 0.50 | 5.41E-30 |
| RL40  | Ubiquitin-60S ribosomal protein L40 UBA52            | 1652 | 885  | 0.48 | 0.000394 |
| ARP3  | Actin-related protein 3 ACTR3                        | 202  | 109  | 0.47 | 1.54E-32 |
| CATD  | Cathepsin D CTSD                                     | 519  | 281  | 0.47 | 0.001111 |
| ASXL3 | Putative Polycomb group protein ASXL3                | 120  | 65   | 0.47 | 2.18E-12 |
| SYNE2 | Nesprin-2                                            | 549  | 299  | 0.46 | 2.89E-81 |

|         |                                                                        |       |      |      |          |
|---------|------------------------------------------------------------------------|-------|------|------|----------|
| ZC3HD   | Zinc finger CCCH domain-containing protein 13<br>ZC3H13                | 402   | 219  | 0.46 | 1.09E-05 |
| RS27A   | Ubiquitin-40S ribosomal protein S27a RPS27A                            | 1658  | 905  | 0.46 | 1.18E-07 |
| TALDO   | Transaldolase TALDO1                                                   | 152   | 83   | 0.46 | 1.34E-09 |
| DYH8    | Dynein heavy chain 8, axonemal DNAH8                                   | 119   | 65   | 0.46 | 3E-05    |
| KC1D    | Casein kinase I isoform delta CSNK1D                                   | 617   | 338  | 0.45 | 0.003169 |
| UBC     | Polyubiquitin-C                                                        | 11628 | 6379 | 0.45 | 0.003169 |
| K1614   | Uncharacterized protein KIAA1614 KIAA1614                              | 134   | 74   | 0.44 | 0.003169 |
| FERM2   | Fermitin family homolog 2 FERMT2                                       | 278   | 154  | 0.44 | 3.81E-43 |
| H2A2C   | Histone H2A type 2-C HIST2H2AC                                         | 652   | 362  | 0.43 | 1.87E-16 |
| H2A2A   | Histone H2A type 2-A HIST2H2AA3                                        | 652   | 362  | 0.43 | 5.17E-63 |
| POTEJ   | POTE ankyrin domain family member J                                    | 1069  | 599  | 0.42 | 8.29E-05 |
| H2A2B   | Histone H2A type 2-B HIST2H2AB                                         | 326   | 183  | 0.42 | 2.98E-16 |
| LMNA    | Prelamin-A/C                                                           | 518   | 291  | 0.42 | 0.009204 |
| PLCE1   | 1-phosphatidylinositol 4,5-bisphosphate<br>phosphodiesterase epsilon-1 | 245   | 138  | 0.41 | 5.15E-07 |
| ESYT1   | Extended synaptotagmin-1                                               | 314   | 177  | 0.41 | 0.000645 |
| H2AX    | Histone H2A.x H2AFX                                                    | 408   | 230  | 0.41 | 2.83E-10 |
|         | Septin-2 SEPT2                                                         | 434   | 245  | 0.41 | 1.1E-61  |
| SEPTIN2 |                                                                        |       |      |      |          |
| H2A1A   | Histone H2A type 1-A HIST1H2AA                                         | 364   | 206  | 0.41 | 4.86E-05 |
| DYH10   | Dynein heavy chain 10, axonemal DNAH10                                 | 189   | 107  | 0.40 | 4.86E-05 |
| H31     | Histone H3.1 HIST1H3A                                                  | 263   | 150  | 0.39 | 2.51E-23 |
| PRS6B   | 26S protease regulatory subunit 6B PSMC4                               | 176   | 101  | 0.39 | 2.48E-68 |
| EF1A1   | Elongation factor 1-alpha 1 EEF1A1                                     | 1568  | 901  | 0.38 | 6.67E-08 |
| EF1A3   | Putative elongation factor 1-alpha-like 3 EEF1A1P5                     | 1560  | 902  | 0.37 | 0.001823 |
| H3C     | Histone H3.3C H3F3C                                                    | 247   | 143  | 0.37 | 0.027488 |
| KTN1    | Kinectin                                                               | 302   | 175  | 0.37 | 0.027488 |
| ATPK    | ATP synthase subunit f, mitochondrial ATP5J2                           | 391   | 227  | 0.37 | 0.027488 |
| H2B1A   | Histone H2B type 1-A HIST1H2BA                                         | 268   | 156  | 0.36 | 0.027488 |
| CENPF   | Centromere protein F                                                   | 211   | 123  | 0.36 | 0.027488 |
| H32     | Histone H3.2 HIST2H3A                                                  | 250   | 146  | 0.36 | 0.027488 |
| H33     | Histone H3.3 H3F3A                                                     | 249   | 146  | 0.35 | 0.027488 |
| H31T    | Histone H3.1t HIST3H3                                                  | 252   | 148  | 0.35 | 0.027488 |
| RAB7A   | Ras-related protein Rab-7a                                             | 278   | 164  | 0.35 | 0.027488 |
| CPNE7   | Copine-7                                                               | 242   | 143  | 0.34 | 2.68E-10 |
| ENPL    | Endoplasmin HSP90B1                                                    | 1538  | 909  | 0.34 | 3.23E-09 |
| TCPG    | T-complex protein 1 subunit gamma CCT3                                 | 244   | 145  | 0.33 | 2.84E-05 |
| ACTBM   | Putative beta-actin-like protein 3 POTEKP                              | 384   | 231  | 0.32 | 3.94E-08 |
| CPNE2   | Copine-2                                                               | 236   | 142  | 0.32 | 0.000374 |
| CAH1    | Carbonic anhydrase 1 CA1                                               | 593   | 358  | 0.31 | 0.000374 |
| LRP1    | Prolow-density lipoprotein receptor-related protein 1                  | 512   | 310  | 0.31 | 6.09E-06 |
| PRDX1   | Peroxiredoxin-1                                                        | 598   | 363  | 0.30 | 7.83E-05 |

|         |                                                             |      |      |       |          |
|---------|-------------------------------------------------------------|------|------|-------|----------|
| LDHA    | L-lactate dehydrogenase A chain                             | 1010 | 617  | 0.30  | 0.005225 |
| CPNE9   | Copine-9                                                    | 338  | 207  | 0.29  | 0.005225 |
| ACTS    | Actin, alpha skeletal muscle ACTA1                          | 4538 | 2804 | 0.28  | 5.13E-09 |
| ACTH    | Actin, gamma-enteric smooth muscle ACTG2                    | 4397 | 2718 | 0.28  | 2.86E-07 |
| ACTC    | Actin, alpha cardiac muscle 1 ACTC1                         | 4549 | 2819 | 0.27  | 1.38E-22 |
| ACTN4   | Alpha-actinin-4                                             | 1544 | 971  | 0.25  | 0.001048 |
| HCDH    | Hydroxyacyl-coenzyme A dehydrogenase, mitochondrial HADH    | 329  | 207  | 0.25  | 0.001048 |
| TCPZ    | T-complex protein 1 subunit zeta CCT6A                      | 405  | 255  | 0.25  | 2.09E-06 |
| PRDX6   | Peroxiredoxin-6                                             | 571  | 363  | 0.24  | 2.17E-08 |
| PRDX2   | Peroxiredoxin-2                                             | 942  | 606  | 0.22  | 1.63E-20 |
| GRP78   | 78 kDa glucose-regulated protein HSPA5                      | 1915 | 1287 | 0.16  | 6.85E-12 |
| TITIN   | Titin TTN                                                   | 1002 | 676  | 0.15  | 5.68E-06 |
| ENOA    | Alpha-enolase ENO1                                          | 1940 | 1326 | 0.13  | 0.000603 |
| ACTN1   | Alpha-actinin-1                                             | 2670 | 1833 | 0.13  | 0.000603 |
| CH60    | 60 kDa heat shock protein, mitochondrial HSPD1              | 2628 | 1809 | 0.12  | 0.01528  |
| PLEC    | Plectin                                                     | 8441 | 5914 | 0.10  | 0.01528  |
| ANXA6   | Annexin A6                                                  | 1891 | 1518 | -0.10 | 0.086307 |
| HS71L   | Heat shock 70 kDa protein 1-like HSPA1L                     | 1530 | 1252 | -0.13 | 0.086307 |
| TBB8    | Tubulin beta-8 chain TUBB8                                  | 2596 | 2152 | -0.15 | 0.086307 |
| TBB3    | Tubulin beta-3 chain TUBB3                                  | 5613 | 4738 | -0.17 | 0.086307 |
| TBB5    | Tubulin beta chain TUBB                                     | 6498 | 5491 | -0.17 | 0.086307 |
| TBB4A   | Tubulin beta-4A chain TUBB4A                                | 6762 | 5715 | -0.17 | 0.086307 |
| ENOG    | Gamma-enolase ENO2                                          | 1479 | 1268 | -0.19 | 0.086307 |
| TBB1    | Tubulin beta-1 chain TUBB1                                  | 981  | 842  | -0.20 | 0.086307 |
| TBB4B   | Tubulin beta-4B chain TUBB4B                                | 6970 | 5999 | -0.20 | 0.086307 |
| TBB2B   | Tubulin beta-2B chain TUBB2B                                | 6997 | 6038 | -0.20 | 0.086307 |
| 1433G   | 14-3-3 protein gamma YWHAG                                  | 1456 | 1260 | -0.21 | 0.086307 |
| TBB2A   | Tubulin beta-2A chain TUBB2A                                | 7091 | 6160 | -0.21 | 0.086307 |
| MYPR    | Myelin proteolipid protein PLP1                             | 5459 | 4752 | -0.22 | 0.086307 |
| CBR1    | Carbonyl reductase [NADPH] 1                                | 398  | 348  | -0.22 | 0.086307 |
| FSCN1   | Fascin                                                      | 466  | 408  | -0.22 | 0.086307 |
| UBA1    | Ubiquitin-like modifier-activating enzyme 1                 | 1734 | 1520 | -0.23 | 0.086307 |
| H90B2   | Putative heat shock protein HSP 90-beta 2<br>HSP90AB2P      | 571  | 503  | -0.23 | 0.086307 |
| VDAC1   | Voltage-dependent anion-selective channel protein 1         | 387  | 342  | -0.24 | 0.086307 |
| YI016   | Putative tubulin beta chain-like protein<br>ENSP00000290377 | 2759 | 2446 | -0.24 | 2.65E-05 |
| HS90A   | Heat shock protein HSP 90-alpha HSP90AA1                    | 2885 | 2570 | -0.25 | 0.00297  |
| ADT4    | ADP/ATP translocase 4 SLC25A31                              | 708  | 633  | -0.25 | 1.15E-82 |
| 1433E   | 14-3-3 protein epsilon YWHAE                                | 1408 | 1270 | -0.27 | 4.82E-11 |
| SEPTIN7 | Septin-7 SEPT7                                              | 522  | 471  | -0.27 | 1.16E-79 |



|       |                                                                                   |         |      |      |       |          |
|-------|-----------------------------------------------------------------------------------|---------|------|------|-------|----------|
| 1433T | 14-3-3 protein theta                                                              | YWHAQ   | 1014 | 915  | -0.27 | 6.14E-25 |
| KINH  | Kinesin-1 heavy chain                                                             | KIF5B   | 309  | 280  | -0.27 | 1.94E-06 |
| NFH   | Neurofilament heavy polypeptide                                                   | NEFH    | 874  | 793  | -0.28 | 0.001692 |
| HSP7C | Heat shock cognate 71 kDa protein                                                 | HSPA8   | 3732 | 3391 | -0.28 | 2.46E-07 |
| CALM1 | Calmodulin                                                                        |         | 632  | 575  | -0.28 | 2.46E-07 |
| HACD3 | Very-long-chain (3R)-3-hydroxyacyl-[acyl-carrier protein] dehydratase 3           | PTPLAD1 | 296  | 272  | -0.29 | 6.96E-09 |
| IMB1  | Importin subunit beta-1                                                           | KPNB1   | 596  | 548  | -0.29 | 4.21E-05 |
| HSP71 | Heat shock 70 kDa protein 1A/1B                                                   | HSPA1A  | 1565 | 1461 | -0.32 | 2E-10    |
| MAP1B | Microtubule-associated protein 1B                                                 |         | 3165 | 2964 | -0.32 | 2.7E-59  |
| HSP72 | Heat shock-related 70 kDa protein 2                                               | HSPA2   | 1828 | 1712 | -0.32 | 0.0002   |
| PEBP1 | Phosphatidylethanolamine-binding protein 1                                        |         | 487  | 458  | -0.33 | 9.12E-12 |
| 1433B | 14-3-3 protein beta/alpha                                                         | YWHAB   | 1293 | 1219 | -0.33 | 0.000966 |
| DYHC1 | Cytoplasmic dynein 1 heavy chain 1                                                | DYNC1H1 | 6203 | 5867 | -0.34 | 0.000115 |
| LDHB  | L-lactate dehydrogenase B chain                                                   |         | 1034 | 982  | -0.34 | 0.000115 |
| TCPD  | T-complex protein 1 subunit delta                                                 | CCT4    | 272  | 263  | -0.37 | 1.04E-06 |
| CAZA1 | F-actin-capping protein subunit alpha-1                                           | CAPZA1  | 123  | 120  | -0.38 | 6.66E-05 |
| DPYL3 | Dihydropyrimidinase-related protein 3                                             | DPYSL3  | 1837 | 1795 | -0.38 | 0.004801 |
| PRC2C | Protein PRRC2C                                                                    | PRRC2C  | 136  | 133  | -0.38 | 0.004801 |
| 2AAA  | Serine/threonine-protein phosphatase 2A 65 kDa regulatory subunit A alpha isoform | PPP2R1A | 624  | 611  | -0.39 | 0.004801 |
| KCRB  | Creatine kinase B-type                                                            | CKB     | 2183 | 2138 | -0.39 | 0.046139 |
| PCNT  | Pericentrin                                                                       |         | 111  | 109  | -0.39 | 0.046139 |
| AP3D1 | AP-3 complex subunit delta-1                                                      |         | 382  | 377  | -0.40 | 0.046139 |
| GNAO  | Guanine nucleotide-binding protein G(o) subunit alpha                             | GNAO1   | 935  | 923  | -0.40 | 0.046139 |
| G6PI  | Glucose-6-phosphate isomerase                                                     | GPI     | 1137 | 1127 | -0.40 | 0.046139 |
| MATR3 | Matrin-3                                                                          |         | 469  | 467  | -0.41 | 0.046139 |
| G3PT  | Glyceraldehyde-3-phosphate dehydrogenase, testis-specific                         | GAPDHS  | 237  | 236  | -0.41 | 0.046139 |
| IDHP  | Isocitrate dehydrogenase [NADP], mitochondrial                                    | IDH2    | 633  | 631  | -0.41 | 0.046139 |
| NEBU  | Nebulin                                                                           | NEB     | 208  | 211  | -0.44 | 0.046139 |
| 1433Z | 14-3-3 protein zeta/delta                                                         | YWHAZ   | 1663 | 1688 | -0.44 | 0.046139 |
| GRP75 | Stress-70 protein, mitochondrial                                                  | HSPA9   | 1207 | 1235 | -0.45 | 0.046139 |
| 1433F | 14-3-3 protein eta                                                                | YWHAH   | 855  | 875  | -0.45 | 0.046139 |
| CLH1  | Clathrin heavy chain 1                                                            | CLTC    | 6849 | 7061 | -0.46 | 0.046139 |
| CDKL5 | Cyclin-dependent kinase-like 5                                                    |         | 145  | 150  | -0.46 | 0.046139 |
| GNA12 | Guanine nucleotide-binding protein subunit alpha-12                               |         | 113  | 117  | -0.47 | 3.85E-05 |
| TLL1  | Tolloid-like protein 1                                                            |         | 141  | 146  | -0.47 | 8.11E-16 |
| PP1R7 | Protein phosphatase 1 regulatory subunit 7                                        | PPP1R7  | 135  | 140  | -0.47 | 2.64E-08 |
| DPYL2 | Dihydropyrimidinase-related protein 2                                             | DPYSL2  | 4651 | 4826 | -0.47 | 0.002711 |
| WDR1  | WD repeat-containing protein 1                                                    |         | 381  | 396  | -0.47 | 0.002711 |
| NDKB  | Nucleoside diphosphate kinase B                                                   | NME2    | 249  | 259  | -0.47 | 1.18E-09 |

|         |                                                                |      |      |       |          |
|---------|----------------------------------------------------------------|------|------|-------|----------|
| SFPQ    | Splicing factor, proline- and glutamine-rich                   | 377  | 393  | -0.48 | 6.7E-16  |
| PYGB    | Glycogen phosphorylase, brain form                             | 1242 | 1301 | -0.48 | 5.49E-07 |
| BPIB3   | BPI fold-containing family B member 3 BPIFB3                   | 177  | 186  | -0.49 | 7.48E-06 |
| THIL    | Acetyl-CoA acetyltransferase, mitochondrial ACAT1              | 235  | 247  | -0.49 | 0.001537 |
| TBA3C   | Tubulin alpha-3C/D chain TUBA3C                                | 5953 | 6264 | -0.49 | 0.000105 |
| ALDOC   | Fructose-bisphosphate aldolase C                               | 659  | 698  | -0.50 | 6.46E-14 |
| AINX    | Alpha-internexin INA                                           | 1693 | 1797 | -0.50 | 5.66E-88 |
| SCRN1   | Secernin-1                                                     | 353  | 375  | -0.50 | 0.013832 |
| CISY    | Citrate synthase, mitochondrial CS                             | 320  | 340  | -0.50 | 0.013832 |
|         | Septin-8 SEPT8                                                 | 326  | 348  | -0.51 | 0.013832 |
| SEPTIN8 |                                                                |      |      |       |          |
| ARP2    | Actin-related protein 2 ACTR2                                  | 102  | 109  | -0.51 | 1.16E-05 |
| H90B3   | Putative heat shock protein HSP 90-beta-3<br>HSP90AB3P         | 638  | 682  | -0.51 | 0.000286 |
| EAA1    | Excitatory amino acid transporter 1 SLC1A3                     | 895  | 961  | -0.52 | 6.74E-06 |
| TBA3E   | Tubulin alpha-3E chain TUBA3E                                  | 5537 | 5946 | -0.52 | 6.74E-06 |
| CAND1   | Cullin-associated NEDD8-dissociated protein 1                  | 1160 | 1246 | -0.52 | 0.000164 |
| MAP4    | Microtubule-associated protein 4                               | 493  | 531  | -0.52 | 0.007694 |
| IDH3A   | Isocitrate dehydrogenase [NAD] subunit alpha,<br>mitochondrial | 466  | 502  | -0.52 | 0.007694 |
| TERA    | Transitional endoplasmic reticulum ATPase VCP                  | 1151 | 1245 | -0.53 | 3.59E-47 |
| NFM     | Neurofilament medium polypeptide NEFM                          | 2883 | 3135 | -0.54 | 5.42E-05 |
| MDHM    | Malate dehydrogenase, mitochondrial MDH2                       | 867  | 943  | -0.54 | 0.004311 |
| ZN195   | Zinc finger protein 195 ZNF195                                 | 79   | 86   | -0.54 | 0.004311 |
| PHB     | Prohibitin                                                     | 214  | 234  | -0.54 | 3.12E-05 |
| BRWD1   | Bromodomain and WD repeat-containing protein 1                 | 156  | 171  | -0.55 | 0.002429 |
| GSTM2   | Glutathione S-transferase Mu 2                                 | 112  | 123  | -0.55 | 0.001375 |
| TBA1A   | Tubulin alpha-1A chain TUBA1A                                  | 7208 | 7925 | -0.55 | 0.001375 |
| PGK2    | Phosphoglycerate kinase 2                                      | 100  | 110  | -0.55 | 5.97E-21 |
| GMFB    | Glia maturation factor beta                                    | 53   | 59   | -0.57 | 0.000446 |
| NFL     | Neurofilament light polypeptide NEFL                           | 2550 | 2847 | -0.57 | 3.12E-69 |
| ARF1    | ADP-ribosylation factor 1                                      | 382  | 429  | -0.58 | 0.000255 |
| ARF3    | ADP-ribosylation factor 3                                      | 382  | 429  | -0.58 | 0.000255 |
| ALDOA   | Fructose-bisphosphate aldolase A                               | 1059 | 1195 | -0.59 | 8.94E-35 |
| MRCKB   | Serine/threonine-protein kinase MRCK beta<br>CDC42BPB          | 68   | 77   | -0.60 | 9.99E-17 |
| NUCL    | Nucleolin NCL                                                  | 352  | 399  | -0.60 | 3.46E-17 |
| HSP76   | Heat shock 70 kDa protein 6 HSPA6                              | 703  | 797  | -0.60 | 4.78E-11 |
| 41528   | Septin-11 SEPT11                                               | 328  | 373  | -0.60 | 8.39E-05 |
| COR1A   | Coronin-1A CORO1A                                              | 381  | 439  | -0.62 | 6.2E-10  |
| COX2    | Cytochrome c oxidase subunit 2 MT-CO2                          | 147  | 170  | -0.63 | 5.38E-06 |
| EIF3B   | Eukaryotic translation initiation factor 3 subunit B           | 57   | 66   | -0.63 | 1.38E-08 |
| H90B4   | Putative heat shock protein HSP 90-beta 4<br>HSP90AB4P         | 169  | 196  | -0.63 | 9.48E-54 |

|         |                                                                               |      |       |       |          |
|---------|-------------------------------------------------------------------------------|------|-------|-------|----------|
| XRCC6   | X-ray repair cross-complementing protein 6                                    | 309  | 359   | -0.63 | 1.62E-51 |
| ATPA    | ATP synthase subunit alpha, mitochondrial ATP5A1                              | 1425 | 1657  | -0.63 | 6.19E-08 |
| GNA11   | Guanine nucleotide-binding protein subunit alpha-11                           | 141  | 165   | -0.64 | 9.29E-07 |
| ACON    | Aconitate hydratase, mitochondrial ACO2                                       | 1756 | 2060  | -0.65 | 0.000692 |
| EFTU    | Elongation factor Tu, mitochondrial TUFM                                      | 255  | 300   | -0.65 | 0.006798 |
| SLN14   | Schlafen family member 14 SLFN14                                              | 56   | 66    | -0.65 | 0.006798 |
| SPTB2   | Spectrin beta chain, non-erythrocytic 1 SPTBN1                                | 6403 | 7559  | -0.66 | 0.022169 |
|         | Septin-6 SEPT6                                                                | 327  | 387   | -0.66 | 0.022169 |
| SEPTIN6 |                                                                               |      |       |       |          |
| GSTM5   | Glutathione S-transferase Mu 5                                                | 103  | 123   | -0.67 | 0.022169 |
| ATPB    | ATP synthase subunit beta, mitochondrial ATP5B                                | 2446 | 2923  | -0.67 | 1.07E-36 |
| SPTN1   | Spectrin alpha chain, non-erythrocytic 1 SPTAN1                               | 9273 | 11153 | -0.68 | 4.28E-05 |
| ACTN2   | Alpha-actinin-2                                                               | 817  | 983   | -0.68 | 0.003811 |
| MTCH2   | Mitochondrial carrier homolog 2                                               | 113  | 137   | -0.69 | 0.012218 |
| GNAI3   | Guanine nucleotide-binding protein G(k) subunit alpha                         | 141  | 171   | -0.69 | 0.04076  |
| UN13A   | Protein unc-13 homolog A UNC13A                                               | 79   | 96    | -0.70 | 0.04076  |
| MARCS   | Myristoylated alanine-rich C-kinase substrate<br>MARCKS                       | 999  | 1214  | -0.70 | 0.04076  |
| HS904   | Putative heat shock protein HSP 90-alpha A4<br>HSP90AA4P                      | 255  | 314   | -0.72 | 0.04076  |
| MPCP    | Phosphate carrier protein, mitochondrial SLC25A3                              | 643  | 803   | -0.74 | 0.04076  |
| MDHC    | Malate dehydrogenase, cytoplasmic MDH1                                        | 359  | 449   | -0.74 | 0.04076  |
| PGAM2   | Phosphoglycerate mutase 2                                                     | 98   | 123   | -0.74 | 0.076418 |
| VATH    | V-type proton ATPase subunit H ATP6V1H                                        | 278  | 349   | -0.74 | 0.076418 |
| GSTO1   | Glutathione S-transferase omega-1                                             | 131  | 165   | -0.75 | 0.076418 |
| ANO2    | Anoctamin-2                                                                   | 65   | 82    | -0.75 | 0.076418 |
| RAB6B   | Ras-related protein Rab-6B                                                    | 57   | 72    | -0.75 | 0.076418 |
| RAB35   | Ras-related protein Rab-35                                                    | 110  | 139   | -0.75 | 0.076418 |
| ANK1    | Ankyrin-1                                                                     | 415  | 526   | -0.76 | 0.076418 |
| MYH10   | Myosin-10                                                                     | 1534 | 1949  | -0.76 | 0.076418 |
| GTR3    | Solute carrier family 2, facilitated glucose transporter<br>member 3 SLC2A3   | 228  | 292   | -0.77 | 0.076418 |
| ARF5    | ADP-ribosylation factor 5                                                     | 192  | 248   | -0.79 | 0.076418 |
| TBA1B   | Tubulin alpha-1B chain TUBA1B                                                 | 6994 | 9067  | -0.79 | 0.076418 |
| IF4G3   | Eukaryotic translation initiation factor 4 gamma 3<br>EIF4G3                  | 97   | 126   | -0.79 | 0.076418 |
| TBA1C   | Tubulin alpha-1C chain TUBA1C                                                 | 6996 | 9092  | -0.79 | 0.076418 |
| CYFP1   | Cytoplasmic FMR1-interacting protein 1 CYFIP1                                 | 513  | 669   | -0.80 | 2.52E-26 |
| COX41   | Cytochrome c oxidase subunit 4 isoform 1,<br>mitochondrial COX4I1             | 150  | 196   | -0.80 | 1.86E-08 |
| GTR14   | Solute carrier family 2, facilitated glucose transporter<br>member 14 SLC2A14 | 224  | 293   | -0.80 | 8.12E-21 |
| ACTZ    | Alpha-centractin ACTR1A                                                       | 116  | 153   | -0.82 | 1.15E-32 |
| PGAM4   | Probable phosphoglycerate mutase 4                                            | 112  | 148   | -0.82 | 1.41E-06 |
| GNAT3   | Guanine nucleotide-binding protein G(t) subunit alpha-                        | 79   | 105   | -0.83 | 1.12E-16 |

|       |                                                          |          |      |      |       |          |
|-------|----------------------------------------------------------|----------|------|------|-------|----------|
| ODO1  | 2-oxoglutarate dehydrogenase, mitochondrial              | OGDH     | 541  | 720  | -0.83 | 4.2E-06  |
| KIF5A | Kinesin heavy chain isoform 5A                           |          | 213  | 286  | -0.84 | 1.07E-48 |
| HNRPR | Heterogeneous nuclear ribonucleoprotein R                | HNRNPR   | 140  | 188  | -0.84 | 9.61E-30 |
| GNAL  | Guanine nucleotide-binding protein G(olf) subunit alpha  |          | 72   | 97   | -0.85 | 6.54E-05 |
| NDKA  | Nucleoside diphosphate kinase A                          | NME1     | 255  | 344  | -0.85 | 2.82E-08 |
| UNC80 | Protein unc-80 homolog                                   |          | 80   | 108  | -0.85 | 4.65E-20 |
| AT5F1 | ATP synthase subunit b, mitochondrial                    | ATP5F1   | 388  | 526  | -0.85 | 1.81E-81 |
| STIP1 | Stress-induced-phosphoprotein 1                          |          | 408  | 554  | -0.86 | 2.44E-07 |
| AP1B1 | AP-1 complex subunit beta-1                              |          | 726  | 986  | -0.86 | 4.13E-12 |
| HS902 | Putative heat shock protein HSP 90-alpha A2              | HSP90AA2 | 511  | 695  | -0.86 | 2.88E-09 |
| ADT3  | ADP/ATP translocase 3                                    | SLC25A6  | 640  | 872  | -0.86 | 0.000607 |
| ADT2  | ADP/ATP translocase 2                                    | SLC25A5  | 563  | 777  | -0.88 | 0.000607 |
| GNAT1 | Guanine nucleotide-binding protein G(t) subunit alpha-1  |          | 78   | 108  | -0.89 | 6.38E-06 |
| MRCKA | Serine/threonine-protein kinase MRCK alpha               | CDC42BPA | 306  | 427  | -0.90 | 6.38E-06 |
| AKA12 | A-kinase anchor protein 12                               | AKAP12   | 570  | 801  | -0.91 | 2.13E-12 |
| RHOB  | Rho-related GTP-binding protein RhoB                     |          | 83   | 117  | -0.91 | 1.48E-09 |
| HSP77 | Putative heat shock 70 kDa protein 7                     | HSPA7    | 354  | 504  | -0.93 | 4.33E-09 |
| MK01  | Mitogen-activated protein kinase 1                       | MAPK1    | 276  | 394  | -0.93 | 7.42E-09 |
| ANR12 | Ankyrin repeat domain-containing protein 12              | ANKRD12  | 112  | 160  | -0.93 | 3.58E-63 |
| HXK3  | Hexokinase-3                                             | HK3      | 262  | 375  | -0.93 | 5.73E-05 |
| KNTC1 | Kinetochore-associated protein 1                         |          | 96   | 138  | -0.94 | 0.005929 |
| PGAM1 | Phosphoglycerate mutase 1                                |          | 347  | 503  | -0.95 | 0.005929 |
| PDC6I | Programmed cell death 6-interacting protein              | PDCD6IP  | 269  | 390  | -0.95 | 0.000173 |
| TBA4A | Tubulin alpha-4A chain                                   | TUBA4A   | 4960 | 7223 | -0.96 | 0.000173 |
| VDAC2 | Voltage-dependent anion-selective channel protein 2      |          | 259  | 378  | -0.96 | 2.44E-36 |
| VPS35 | Vacuolar protein sorting-associated protein 35           |          | 505  | 750  | -0.99 | 0.010626 |
| GNAT2 | Guanine nucleotide-binding protein G(t) subunit alpha-2  |          | 70   | 104  | -0.99 | 0.010626 |
| KIF5C | Kinesin heavy chain isoform 5C                           |          | 219  | 327  | -0.99 | 6.67E-10 |
| LPPRC | Leucine-rich PPR motif-containing protein, mitochondrial | LRPPRC   | 602  | 899  | -0.99 | 5.55E-07 |
| SPTB1 | Spectrin beta chain, erythrocytic                        | SPTB     | 620  | 933  | -1.01 | 3.26E-08 |
| AP2A1 | AP-2 complex subunit alpha-1                             |          | 1049 | 1581 | -1.01 | 1.77E-62 |
| DPYL1 | Dihydropyrimidinase-related protein 1                    | CRMP1    | 1151 | 1735 | -1.01 | 2.89E-05 |
| PI4KA | Phosphatidylinositol 4-kinase alpha                      |          | 189  | 285  | -1.01 | 5E-05    |
| AP2A2 | AP-2 complex subunit alpha-2                             |          | 824  | 1251 | -1.02 | 5E-05    |
| DDAH1 | N(G),N(G)-dimethylarginine dimethylaminohydrolase 1      |          | 201  | 306  | -1.02 | 0.000929 |
| GNAI1 | Guanine nucleotide-binding protein G(i) subunit alpha-1  |          | 168  | 256  | -1.02 | 0.019209 |
| PDXK  | Pyridoxal kinase                                         |          | 325  | 496  | -1.03 | 0.019209 |

|       |                                                                          |      |      |       |          |
|-------|--------------------------------------------------------------------------|------|------|-------|----------|
| PSA   | Puromycin-sensitive aminopeptidase NPEPPS                                | 828  | 1277 | -1.04 | 0.019209 |
| AT1A1 | Sodium/potassium-transporting ATPase subunit alpha-1 ATP1A1              | 3343 | 5167 | -1.04 | 2.44E-22 |
| AT1A3 | Sodium/potassium-transporting ATPase subunit alpha-3 ATP1A3              | 3354 | 5193 | -1.05 | 1.7E-09  |
| NCAM1 | Neural cell adhesion molecule 1                                          | 906  | 1424 | -1.07 | 0.001634 |
| PRDX5 | Peroxiredoxin-5, mitochondrial                                           | 167  | 263  | -1.07 | 0.001634 |
| MAP1A | Microtubule-associated protein 1A                                        | 1569 | 2506 | -1.09 | 4.88E-08 |
| AP2B1 | AP-2 complex subunit beta                                                | 1317 | 2106 | -1.09 | 4.04E-45 |
| RTN4  | Reticulon-4                                                              | 701  | 1133 | -1.11 | 2.4E-32  |
| KPCA  | Protein kinase C alpha type PRKCA                                        | 270  | 440  | -1.12 | 0.002887 |
| ARI4B | AT-rich interactive domain-containing protein 4B ARID4B                  | 64   | 105  | -1.13 | 0.035129 |
| PYGM  | Glycogen phosphorylase, muscle form                                      | 339  | 560  | -1.14 | 0.035129 |
| ENPLL | Putative endoplasmic-like protein HSP90B2P                               | 118  | 196  | -1.15 | 0.035129 |
| NSF   | Vesicle-fusing ATPase                                                    | 1431 | 2402 | -1.16 | 0.035129 |
| ATP4A | Potassium-transporting ATPase alpha chain 1                              | 564  | 954  | -1.17 | 0.000263 |
| ADT1  | ADP/ATP translocase 1 SLC25A4                                            | 518  | 877  | -1.18 | 8.1E-84  |
| HSP74 | Heat shock 70 kDa protein 4 HSPA4                                        | 421  | 716  | -1.18 | 1.15E-27 |
| C170B | Centrosomal protein of 170 kDa protein B CEP170B                         | 55   | 94   | -1.19 | 7.58E-10 |
| KCC2D | Calcium/calmodulin-dependent protein kinase type II subunit delta CAMK2D | 324  | 554  | -1.19 | 4.35E-05 |
| GBB3  | Guanine nucleotide-binding protein G(I)/G(S)/G(T) subunit beta-3 GNB3    | 222  | 382  | -1.20 | 0.000459 |
| AT1A2 | Sodium/potassium-transporting ATPase subunit alpha-2 ATP1A2              | 2855 | 4961 | -1.21 | 0.000459 |
| HXK1  | Hexokinase-1 HK1                                                         | 1543 | 2687 | -1.22 | 0.005124 |
| GBB2  | Guanine nucleotide-binding protein G(I)/G(S)/G(T) subunit beta-2 GNB2    | 425  | 743  | -1.22 | 0.005124 |
| GBB1  | Guanine nucleotide-binding protein G(I)/G(S)/G(T) subunit beta-1 GNB1    | 423  | 742  | -1.23 | 0.000804 |
| TBA8  | Tubulin alpha-8 chain TUBA8                                              | 3377 | 5926 | -1.23 | 1.91E-29 |
| UBE3B | Ubiquitin-protein ligase E3B                                             | 192  | 338  | -1.23 | 1.2E-36  |
| AATC  | Aspartate aminotransferase, cytoplasmic GOT1                             | 379  | 673  | -1.24 | 5.6E-09  |
| FRM4B | FERM domain-containing protein 4B FRMD4B                                 | 73   | 130  | -1.25 | 3.22E-08 |
| GBB4  | Guanine nucleotide-binding protein subunit beta-4 GNB4                   | 380  | 681  | -1.26 | 0.000228 |
| CD47  | Leukocyte surface antigen CD47                                           | 139  | 250  | -1.26 | 0.009147 |
| KPCB  | Protein kinase C beta type PRKCB                                         | 266  | 482  | -1.27 | 0.009147 |
| SYG   | Glycine--tRNA ligase GARS                                                | 193  | 350  | -1.27 | 0.065317 |
| QCR2  | Cytochrome b-c1 complex subunit 2, mitochondrial UQCRC2                  | 314  | 570  | -1.28 | 0.065317 |
| SYAC  | Alanine--tRNA ligase, cytoplasmic AARS                                   | 368  | 671  | -1.28 | 0.065317 |
| AN30A | Ankyrin repeat domain-containing protein 30A ANKRD30A                    | 284  | 520  | -1.29 | 0.065317 |
| TRAP1 | Heat shock protein 75 kDa, mitochondrial                                 | 217  | 405  | -1.32 | 0.065317 |
| HXK2  | Hexokinase-2 HK2                                                         | 326  | 624  | -1.35 | 0.065317 |

|       |                                                                   |      |      |       |          |
|-------|-------------------------------------------------------------------|------|------|-------|----------|
| SPTN4 | Spectrin beta chain, non-erythrocytic 4 SPTBN4                    | 91   | 175  | -1.36 | 0.065317 |
| CAC1E | Voltage-dependent R-type calcium channel subunit alpha-1E CACNA1E | 54   | 104  | -1.36 | 0.065317 |
| ALDOB | Fructose-bisphosphate aldolase B                                  | 59   | 114  | -1.37 | 0.065317 |
| FAS   | Fatty acid synthase FASN                                          | 656  | 1278 | -1.38 | 0.065317 |
| TLN2  | Talin-2                                                           | 705  | 1421 | -1.43 | 0.065317 |
| AT1A4 | Sodium/potassium-transporting ATPase subunit alpha-4 ATP1A4       | 1097 | 2258 | -1.46 | 1.67E-09 |
| AT12A | Potassium-transporting ATPase alpha chain 2 ATP12A                | 375  | 794  | -1.50 | 0.002486 |
| 4F2   | 4F2 cell-surface antigen heavy chain SLC3A2                       | 346  | 737  | -1.51 | 0.002486 |
| NNTM  | NAD(P) transhydrogenase, mitochondrial NNT                        | 535  | 1155 | -1.53 | 2.79E-55 |
| CALL3 | Calmodulin-like protein 3 CALML3                                  | 67   | 146  | -1.54 | 0.000693 |
| CSPG2 | Versican core protein VCAN                                        | 221  | 506  | -1.61 | 0.000693 |
| IMMT  | Mitochondrial inner membrane protein                              | 394  | 921  | -1.64 | 0.016451 |
| K6PF  | 6-phosphofructokinase, muscle type PFKM                           | 338  | 803  | -1.66 | 0.016451 |
| TBA4B | Putative tubulin-like protein alpha-4B TUBA4B                     | 1771 | 4284 | -1.69 | 0.016451 |
| MD1L1 | Mitotic spindle assembly checkpoint protein MAD1 MAD1L1           | 94   | 232  | -1.72 | 0.016451 |
| AP2M1 | AP-2 complex subunit mu                                           | 245  | 629  | -1.78 | 0.004398 |
| CSKI1 | Caskin-1 CASKIN1                                                  | 134  | 375  | -1.90 | 3.95E-30 |
| RTN3  | Reticulon-3                                                       | 214  | 631  | -1.98 | 1.3E-27  |
| LETM1 | LETM1 and EF-hand domain-containing protein 1, mitochondrial      | 176  | 557  | -2.08 | 0.001213 |
| SPTN2 | Spectrin beta chain, non-erythrocytic 2 SPTBN2                    | 408  | 1606 | -2.39 | 0.000341 |
| ANK3  | Ankyrin-3                                                         | 133  | 584  | -2.55 | 9.74E-05 |

## Supplemental Table 2

### A. Top Diseases and Bio Functions of Up-regulated Proteins

#### Diseases and Disorders

| Name                    | p-value             | # Molecules |
|-------------------------|---------------------|-------------|
| Cancer                  | 1.72E-12 - 2.56E-04 | 160         |
| Neurological Disease    | 1.81E-13 - 2.95E-04 | 74          |
| Psychological Disorders | 1.81E-13 - 1.65E-04 | 58          |
| Metabolic Disease       | 1.61E-12 - 2.12E-04 | 59          |
| Cardiovascular Disease  | 5.88E-14 - 2.12E-04 | 64          |

#### Molecular and Cellular Functions

| Name                                   | p-value             | # Molecules |
|----------------------------------------|---------------------|-------------|
| Cellular Movement                      | 5.94E-15 - 3.16E-04 | 78          |
| Cell Death and Survival                | 6.91E-15 - 2.71E-04 | 106         |
| Cell-To-Cell Signaling and Interaction | 2.32E-12 - 2.95E-04 | 77          |
| Free Radical Scavenging                | 1.03E-11 - 1.04E-04 | 30          |
| Cell Morphology                        | 8.85E-11 - 3.12E-04 | 82          |

#### Physiological System Development and Function

| Name                                          | p-value             | # Molecules |
|-----------------------------------------------|---------------------|-------------|
| Immune Cell Trafficking                       | 6.98E-13 - 2.78E-04 | 56          |
| Nervous System Development and Function       | 1.26E-10 - 2.84E-04 | 46          |
| Tissue Development                            | 1.62E-10 - 2.95E-04 | 76          |
| Hematological System Development and Function | 1.77E-10 - 2.95E-04 | 71          |
| Organismal Survival                           | 4.59E-10 - 1.08E-06 | 77          |

#### Top Canonical Pathways

| Name                                     | p-value  | Ratio         |
|------------------------------------------|----------|---------------|
| Acute Phase Response Signaling           | 2.1E-19  | 24/181(0.133) |
| LXR/RXR Activation                       | 5.44E-14 | 17/139(0.122) |
| Intrinsic Prothrombin Activation Pathway | 4.11E-13 | 10/37(0.27)   |
| Coagulation System                       | 5.35E-12 | 10/38(0.263)  |
| Extrinsic Prothrombin Activation Pathway | 2.78E-10 | 7/22(0.318)   |

#### Top Upstream Regulators

| Upstream Regulator | p-value of overlap | Predicted Activation State* |
|--------------------|--------------------|-----------------------------|
| MYC                | 1.11E-18           |                             |
| TGFB1              | 1.18E-17           |                             |
| lipopolysaccharide | 6.47E-17           |                             |
| TP53               | 8.28E-17           |                             |
| IL6                | 2.22E-15           |                             |

\*Predicted activation state results are not provided as this analysis will give biased results due to either only up- or down-regulated proteins in each list.

## B. Top Diseases and Bio Functions of Down-regulated Proteins

### Diseases and Disorders

| Name                                | p-value             | # Molecules |
|-------------------------------------|---------------------|-------------|
| Neurological Disease                | 2.09E-07 - 2.78E-02 | 28          |
| Psychological Disorders             | 2.09E-07 - 1.75E-02 | 16          |
| Hereditary Disorder                 | 2.09E-07 - 1.75E-02 | 28          |
| Immunological Disease               | 1.36E-07 - 2.44E-02 | 7           |
| Organismal Injury and Abnormalities | 1.36E-07 - 2.67E-02 | 16          |

### Molecular and Cellular Functions

| Name                               | p-value             | # Molecules |
|------------------------------------|---------------------|-------------|
| Molecular Transport                | 8.85E-09 - 2.87E-02 | 35          |
| Carbohydrate Metabolism            | 9.42E-06 - 2.78E-02 | 15          |
| Cell Morphology                    | 1.16E-05 - 2.86E-02 | 28          |
| Cellular Assembly and Organization | 1.16E-05 - 3.01E-02 | 29          |
| Cellular Compromise                | 1.22E-05 - 2.44E-02 | 10          |

### Physiological System Development and Function

| Name                                     | p-value             | # Molecules |
|------------------------------------------|---------------------|-------------|
| Behavior                                 | 4.27E-06 - 2.09E-02 | 15          |
| Cardiovascular System Development        | 1.04E-05 - 1.66E-02 | 13          |
| Organ Morphology                         | 3.34E-05 - 2.78E-02 | 13          |
| Organismal Development                   | 3.65E-05 - 2.78E-02 | 11          |
| Skeletal and Muscular System Development | 1.92E-04 - 2.78E-02 | 14          |

### Top Canonical Pathways

| Name                                  | p-value  | Ratio        |
|---------------------------------------|----------|--------------|
| a-Adrenergic Signaling                | 7.73E-10 | 8/109(0.073) |
| CCR5 Signaling in Macrophages         | 4.81E-09 | 7/97(0.072)  |
| Androgen Signaling                    | 5.35E-09 | 8/145(0.055) |
| Breast Cancer Regulation by Stathmin1 | 2.37E-08 | 9/214(0.042) |
| G Beta Gamma Signaling                | 2.63E-08 | 7/121(0.058) |

### Top Upstream Regulators

| Upstream Regulator | p-value of overlap | Predicted Activation State* |
|--------------------|--------------------|-----------------------------|
| MAPT               | 1.03E-10           |                             |
| PSEN1              | 5.91E-10           |                             |
| APP                | 1.29E-09           |                             |
| D-glucose          | 7.80E-08           |                             |
| Ins1               | 3.14E-06           |                             |

\*Predicted activation state results are not provided as this analysis will give biased results due to either only up- or down-regulated proteins in each list.
